# Supplementary material for: Six-fold-symmetry internal rotation in toluenes: the low barrier challenge of 2,6- and 3,5-difluorotoluene
Source: Royal Society of Chemistry journal article supplement (doi:10.1039/c5cp03751d), 2015-01-01
Supplement: c5cp03751d1.pdf [file c5cp03751d1.pdf]

**SIX-FOLD SYMMETRY INTERNAL ROTATION IN TOLUENES:  
THE LOW BARRIER CHALLENGE OF 2,6- AND 3,5-DIFLUOROTOLUENE**

**ELECTRONIC SUPPLEMENTARY INFORMATION**

K. P. Rajappan Nair,<sup>a</sup> Michaela K. Jahn,<sup>a</sup> Alberto Lesarri,<sup>b</sup>  
Vadim V. Ilyushin,<sup>c</sup> Jens-Uwe Grabow<sup>a</sup>

<sup>a</sup>Institut für Physikalische Chemie und Elektrochemie, Wilhelm-Gottfried-Leibniz-Universität Hannover, Callinstraße 3A, 30167 Hannover (Germany)

<sup>b</sup>Departamento de Química Física y Química Inorgánica, Facultad de Ciencias, Universidad de Valladolid, 47011 Valladolid (Spain)

<sup>c</sup>Institute of Radio Astronomy of NASU, Chervonopraporna 4, 61002 Kharkov (Ukraine)

**Figure S1.** Torsional potential function for 2,6- and 3,5-difluorotoluene (torsion dihedral angle defined as H-C7-C1-C2; torsion origin for a methyl C-H bond coplanar with the benzyl ring).

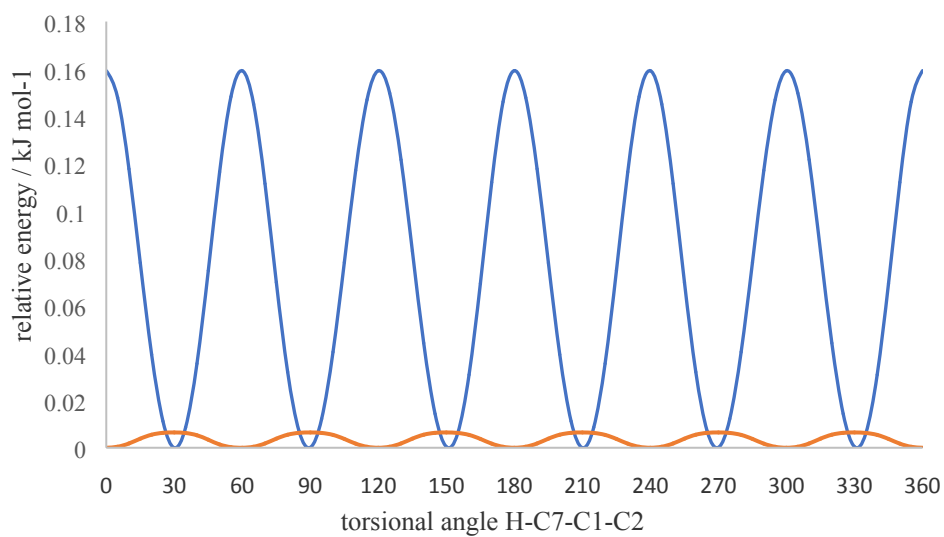

**Figure S2.** Illustration of rotational transitions in 2,6- and 3,5-difluorotoluene (top and down traces, respectively).

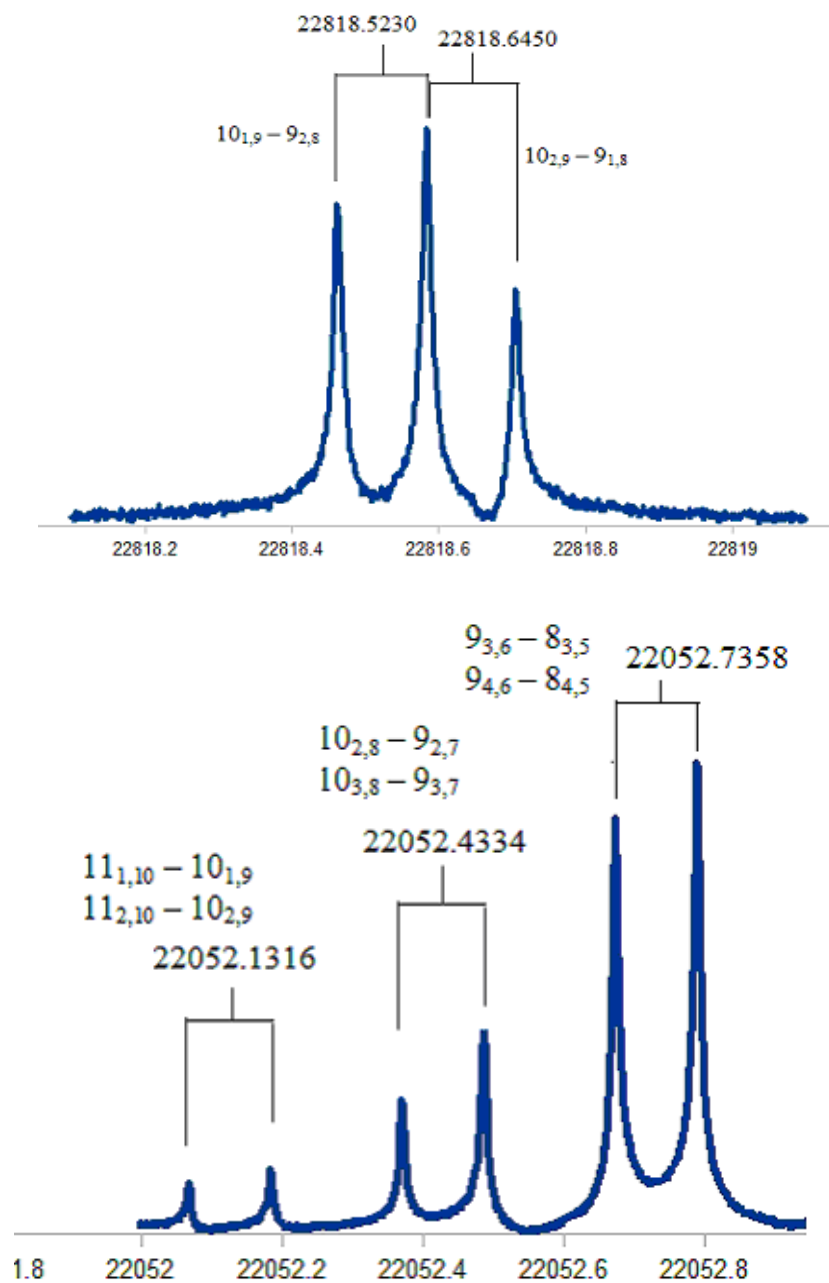

**Table S1.** Rotational parameters for the  $^{13}\text{C}$  isotopic species of 2,6-difluorotoluene.

|                | $^{13}\text{C}(1)$ | $^{13}\text{C}(2), ^{13}\text{C}(6)$ | $^{13}\text{C}(3), ^{13}\text{C}(5)$ | $^{13}\text{C}(4)$ | $^{13}\text{C}(7)$ |
|----------------|--------------------|--------------------------------------|--------------------------------------|--------------------|--------------------|
| <i>A</i> (MHz) | 2265.24743(25)     | 2270.4559(15)                        | 2250.6222(11)                        | 2226.00964(20)     | 2221.48138(22)     |
| <i>B</i> (MHz) | 1743.06740(12)     | 1734.8370(15)                        | 1734.0077(11)                        | 1742.99541(21)     | 1742.99796(19)     |
| <i>C</i> (MHz) | 991.045912(22)     | 989.368957(29)                       | 985.316430(22)                       | 983.436666(38)     | 982.547947(37)     |
| <i>N</i>       | 53                 | 61                                   | 68                                   | 57                 | 47                 |
| $\sigma$ (kHz) | 1.0                | 1.6                                  | 1.2                                  | 1.8                | 1.8                |

**Table S2.** Rotational parameters for the  $^{13}\text{C}$  isotopic species of 3,5-difluorotoluene.

|                | $^{13}\text{C}(1)$ | $^{13}\text{C}(2), ^{13}\text{C}(6)$ | $^{13}\text{C}(3), ^{13}\text{C}(5)$ | $^{13}\text{C}(4)$ | $^{13}\text{C}(7)$ |
|----------------|--------------------|--------------------------------------|--------------------------------------|--------------------|--------------------|
| <i>A</i> (MHz) | 1751.37601(58)     | 1762.02786(65)                       | 1762.57786(68)                       | 1752.76720(21)     | 1745.19054(20)     |
| <i>B</i> (MHz) | 1745.21262(55)     | 1735.31944(66)                       | 1736.21712(68)                       | 1745.28119(29)     | 1711.98540(19)     |
| <i>C</i> (MHz) | 878.855314(37)     | 878.999347(21)                       | 879.365172(17)                       | 879.224262(44)     | 868.815129(27)     |
| <i>N</i>       | 36                 | 42                                   | 43                                   | 42                 | 27                 |
| $\sigma$ (kHz) | 1.8                | 1.1                                  | 1.0                                  | 1.6                | 1.1                |

**Table S3.** Atomic coordinates for the substitution ( $r_s$ ) and ab initio ( $r_e$ ) structures of 2,6-difluorotoluene (Principal inertial axes labeled as  $a$ ,  $b$ ,  $c$ ; all coordinates in ångstrom).

|    | $r_s$            |             |     | <i>Ab initio</i> |        |        |
|----|------------------|-------------|-----|------------------|--------|--------|
|    | $a$              | $b$         | $c$ | $a$              | $b$    | $c$    |
| C1 | [0] <sup>a</sup> | -0.71232(2) | [0] | 0.000            | -0.714 | 0.005  |
| C2 | -1.16907(9)      | [0]         | [0] | -1.174           | 0.032  | 0.000  |
| C3 | -1.20860(5)      | 1.41761(4)  | [0] | -1.207           | 1.416  | -0.001 |
| C4 | [0]              | 2.11167(1)  | [0] | 0.001            | 2.108  | 0.001  |
| C5 | 1.20860(5)       | 1.41761(4)  | [0] | 1.207            | 1.416  | 0.001  |
| C6 | 1.16907(9)       | [0.000]     | [0] | 1.174            | 0.032  | 0.000  |
| C7 | [0]              | -2.21867(1) | [0] | -0.001           | -2.210 | 0.003  |
| F  |                  |             |     | -2.343           | -0.636 | -0.003 |
| F  |                  |             |     | 2.342            | -0.637 | -0.003 |
| H  |                  |             |     | -2.162           | 1.927  | -0.001 |
| H  |                  |             |     | 0.001            | 3.192  | 0.000  |
| H  |                  |             |     | 2.163            | 1.926  | 0.000  |
| H  |                  |             |     | 0.003            | -2.600 | -1.019 |
| H  |                  |             |     | -0.892           | -2.593 | 0.501  |
| H  |                  |             |     | 0.884            | -2.597 | 0.509  |

<sup>a</sup>Values in squared brackets were kept fixed to zero.

**Table S4.** Atomic coordinates for the substitution ( $r_s$ ) and ab initio ( $r_e$ ) structures of 3,5-difluorotoluene (Principal inertial axes labeled as  $a$ ,  $b$ ,  $c$ ; all coordinates in angstrom).

|    | $r_s$       |             |     | $Ab\ initio$ |        |        |
|----|-------------|-------------|-----|--------------|--------|--------|
|    | $a$         | $b$         | $c$ | $A$          | $B$    | $C$    |
| C1 | [0]         | 1.45130(3)  | [0] | -0.007       | -1.456 | -0.013 |
| C2 | -1.21040(3) | 0.73822(8)  | [0] | 1.200        | -0.755 | -0.009 |
| C3 | -1.17228(4) | -0.6289(1)  | [0] | 1.181        | 0.629  | 0.001  |
| C4 | [0]         | -1.36711(2) | [0] | 0.006        | 1.362  | 0.007  |
| C5 | 1.17228(4)  | -0.6289(1)  | [0] | -1.175       | 0.639  | 0.001  |
| C6 | 1.21040(3)  | 0.73822(8)  | [0] | -1.207       | -0.744 | -0.010 |
| C7 | [0]         | 2.96304(2)  | [0] | -0.014       | -2.957 | 0.012  |
| F  |             |             |     | 2.348        | 1.295  | 0.001  |
| F  |             |             |     | -2.336       | 1.316  | 0.002  |
| H  |             |             |     | 2.153        | -1.273 | -0.016 |
| H  |             |             |     | 0.011        | 2.445  | 0.009  |
| H  |             |             |     | -2.165       | -1.253 | -0.018 |
| H  |             |             |     | -0.030       | -3.326 | 1.042  |
| H  |             |             |     | 0.874        | -3.365 | -0.473 |
| H  |             |             |     | -0.894       | -3.356 | -0.495 |

<sup>a</sup>Values in squared brackets were kept fixed to zero.

**Table S5.** Rotational transitions of the parent species of 2,6-difluorotoluene, sorted by branch, together with fit residuals (o.-c., frequencies in MHz). Rotational transitions labeled with symmetry species, free rotor quantum number ( $m$ ), and asymmetric rotor quantum numbers ( $J$ ,  $K_a$ ,  $K_c$ ).

| Upper level |    |    |     | Lower level |     |   |    | Measured(Unc. ) | o.-c. (MHz) |                   |         |
|-------------|----|----|-----|-------------|-----|---|----|-----------------|-------------|-------------------|---------|
| Sym'        | m' | J' | Ka' | Kc'         | Sym | m | J  | Ka              | Kc          |                   |         |
| B1          | 0  | 2  | 1   | 2           | B2  | 0 | 1  | 0               | 1           | 5246.3820(0.002)  | -0.0011 |
| A2          | 0  | 3  | 1   | 3           | A1  | 0 | 2  | 0               | 2           | 7058.6730(0.002)  | -0.0022 |
| B1          | 0  | 4  | 1   | 4           | B2  | 0 | 3  | 0               | 3           | 8956.8990(0.002)  | 0.0016  |
| A2          | 0  | 5  | 1   | 5           | A1  | 0 | 4  | 0               | 4           | 10918.4910(0.002) | 0.0007  |
| B1          | 0  | 6  | 1   | 6           | B2  | 0 | 5  | 0               | 5           | 12897.7080(0.002) | 0.0008  |
| A2          | 0  | 7  | 1   | 7           | A1  | 0 | 6  | 0               | 6           | 14880.6620(0.002) | -0.0001 |
| B1          | 0  | 8  | 1   | 8           | B2  | 0 | 7  | 0               | 7           | 16864.3640(0.002) | 0.0007  |
| A2          | 0  | 9  | 1   | 9           | A1  | 0 | 8  | 0               | 8           | 18848.2310(0.002) | 0.0023  |
|             |    |    |     |             |     |   |    |                 |             |                   |         |
| B1          | 0  | 5  | 1   | 4           | B2  | 0 | 5  | 0               | 5           | 8780.3766(0.002)  | 0.0043  |
| A2          | 0  | 6  | 1   | 5           | A1  | 0 | 6  | 0               | 6           | 10805.0584(0.002) | -0.0007 |
| B1          | 0  | 7  | 1   | 6           | B2  | 0 | 7  | 0               | 7           | 12802.7847(0.002) | -0.0046 |
| A2          | 0  | 8  | 1   | 7           | A1  | 0 | 8  | 0               | 8           | 14792.8227(0.002) | -0.0012 |
| B1          | 0  | 9  | 1   | 8           | B2  | 0 | 9  | 0               | 9           | 16780.3770(0.002) | -0.0021 |
|             |    |    |     |             |     |   |    |                 |             |                   |         |
| B1          | 0  | 10 | 0   | 10          | B2  | 0 | 9  | 0               | 9           | 20832.1420(0.002) | -0.0002 |
| B2          | 0  | 11 | 0   | 11          | B1  | 0 | 10 | 0               | 10          | 22816.0760(0.002) | 0.0005  |
| B1          | 0  | 12 | 0   | 12          | B2  | 0 | 11 | 0               | 11          | 24800.0180(0.002) | -0.0010 |
|             |    |    |     |             |     |   |    |                 |             |                   |         |
| B2          | 0  | 2  | 2   | 1           | B1  | 0 | 1  | 1               | 0           | 7803.1620(0.002)  | 0.0002  |
| B2          | 0  | 4  | 2   | 3           | B1  | 0 | 3  | 1               | 2           | 11434.7910(0.002) | -0.0070 |
| A1          | 0  | 5  | 2   | 4           | A2  | 0 | 4  | 1               | 3           | 13095.0120(0.002) | 0.0010  |
| B2          | 0  | 6  | 2   | 5           | B1  | 0 | 5  | 1               | 4           | 14938.3040(0.002) | 0.0017  |
| A1          | 0  | 7  | 2   | 6           | A2  | 0 | 6  | 1               | 5           | 16881.5600(0.002) | 0.0007  |
| B2          | 0  | 8  | 2   | 7           | B1  | 0 | 7  | 1               | 6           | 18854.9850(0.002) | 0.0003  |
| A1          | 0  | 9  | 2   | 8           | A2  | 0 | 8  | 1               | 7           | 20835.8880(0.002) | 0.0008  |
| B2          | 0  | 10 | 2   | 9           | B1  | 0 | 9  | 1               | 8           | 22818.6450(0.002) | 0.0007  |
| A1          | 0  | 11 | 2   | 10          | A2  | 0 | 10 | 1               | 9           | 24801.9540(0.002) | -0.0011 |
|             |    |    |     |             |     |   |    |                 |             |                   |         |
| A1          | 0  | 6  | 2   | 4           | A2  | 0 | 6  | 1               | 5           | 8472.9084(0.002)  | -0.0001 |
| B2          | 0  | 7  | 2   | 5           | B1  | 0 | 7  | 1               | 6           | 10616.8335(0.002) | -0.0024 |
| A1          | 0  | 8  | 2   | 6           | A2  | 0 | 8  | 1               | 7           | 12662.0328(0.002) | -0.0002 |
| A1          | 0  | 10 | 2   | 8           | A2  | 0 | 10 | 1               | 9           | 16669.4469(0.002) | 0.0039  |
|             |    |    |     |             |     |   |    |                 |             |                   |         |
| A1          | 0  | 5  | 2   | 4           | A2  | 0 | 5  | 1               | 5           | 8852.1951(0.002)  | -0.0001 |
| B2          | 0  | 6  | 2   | 5           | B1  | 0 | 6  | 1               | 6           | 10820.9657(0.002) | -0.0016 |
| A1          | 0  | 7  | 2   | 6           | A2  | 0 | 7  | 1               | 7           | 12805.9550(0.002) | -0.0013 |
| B2          | 0  | 8  | 2   | 7           | B1  | 0 | 8  | 1               | 8           | 14793.4083(0.002) | -0.0024 |
| A1          | 0  | 9  | 2   | 8           | A2  | 0 | 9  | 1               | 9           | 16780.4813(0.002) | -0.0010 |
|             |    |    |     |             |     |   |    |                 |             |                   |         |
| A1          | 0  | 2  | 0   | 2           | A2  | 0 | 1  | 1               | 1           | 4556.3270(0.002)  | 0.0003  |
| B2          | 0  | 3  | 0   | 3           | B1  | 0 | 2  | 1               | 2           | 6833.5910(0.002)  | -0.0010 |
| A1          | 0  | 4  | 0   | 4           | A2  | 0 | 3  | 1               | 3           | 8904.6180(0.002)  | -0.0001 |
| B2          | 0  | 5  | 0   | 5           | B1  | 0 | 4  | 1               | 4           | 10908.3320(0.002) | 0.0010  |
| A1          | 0  | 6  | 0   | 6           | A2  | 0 | 5  | 1               | 5           | 12895.9170(0.002) | 0.0003  |
| B2          | 0  | 7  | 0   | 7           | B1  | 0 | 6  | 1               | 6           | 14880.3660(0.002) | 0.0007  |



|    |   |    |   |    |    |   |    |   |    |                    |         |
|----|---|----|---|----|----|---|----|---|----|--------------------|---------|
| A1 | 0 | 8  | 0 | 8  | A2 | 0 | 7  | 1 | 7  | 16864.3170 (0.002) | 0.0009  |
| B2 | 0 | 9  | 0 | 9  | B1 | 0 | 8  | 1 | 8  | 18848.2190 (0.002) | -0.0025 |
| A1 | 0 | 10 | 1 | 10 | A2 | 0 | 9  | 1 | 9  | 20832.1420 (0.002) | 0.0009  |
| A2 | 0 | 11 | 1 | 11 | A1 | 0 | 10 | 1 | 10 | 22816.0760 (0.002) | 0.0004  |
| A1 | 0 | 12 | 1 | 12 | A2 | 0 | 11 | 1 | 11 | 24800.0180 (0.002) | -0.0010 |
| A2 | 0 | 4  | 1 | 3  | A1 | 0 | 3  | 2 | 2  | 10361.0980 (0.002) | -0.0029 |
| B1 | 0 | 5  | 1 | 4  | B2 | 0 | 4  | 2 | 3  | 12741.5330 (0.002) | -0.0039 |
| A2 | 0 | 6  | 1 | 5  | A1 | 0 | 5  | 2 | 4  | 14848.7810 (0.002) | 0.0004  |
| B1 | 0 | 7  | 1 | 6  | B2 | 0 | 6  | 2 | 5  | 16862.1880 (0.002) | 0.0007  |
| A2 | 0 | 8  | 1 | 7  | A1 | 0 | 7  | 2 | 6  | 18851.1840 (0.002) | 0.0003  |
| B1 | 0 | 9  | 1 | 8  | B2 | 0 | 8  | 2 | 7  | 20835.1910 (0.002) | 0.0012  |
| A2 | 0 | 10 | 1 | 9  | A1 | 0 | 9  | 2 | 8  | 22818.5230 (0.002) | 0.0005  |
| B1 | 0 | 11 | 1 | 10 | B2 | 0 | 10 | 2 | 9  | 24801.9380 (0.002) | 0.0034  |
| A2 | 0 | 5  | 3 | 3  | A1 | 0 | 4  | 2 | 2  | 16169.8604 (0.002) | -0.0034 |
| A2 | 0 | 7  | 3 | 5  | A1 | 0 | 6  | 2 | 4  | 19112.5030 (0.002) | 0.0041  |
| B1 | 0 | 8  | 3 | 6  | B2 | 0 | 7  | 2 | 5  | 20920.8190 (0.002) | 0.0020  |
| A2 | 0 | 9  | 3 | 7  | A1 | 0 | 8  | 2 | 6  | 22849.9580 (0.002) | 0.0016  |
| B1 | 0 | 3  | 3 | 0  | B2 | 0 | 2  | 2 | 1  | 13151.1520 (0.002) | 0.0000  |
| B1 | 0 | 5  | 3 | 2  | B2 | 0 | 4  | 2 | 3  | 22601.1060 (0.002) | 0.0012  |
| A2 | 0 | 5  | 3 | 3  | A1 | 0 | 5  | 2 | 4  | 7041.0404 (0.002)  | 0.0031  |
| B1 | 0 | 6  | 3 | 4  | B2 | 0 | 6  | 2 | 5  | 8786.5790 (0.002)  | -0.0017 |
| A2 | 0 | 7  | 3 | 5  | A1 | 0 | 7  | 2 | 6  | 10703.8475 (0.002) | -0.0006 |
| B1 | 0 | 8  | 3 | 6  | B2 | 0 | 8  | 2 | 7  | 12682.6678 (0.002) | -0.0004 |
| A2 | 0 | 9  | 3 | 7  | A1 | 0 | 9  | 2 | 8  | 14676.1063 (0.002) | 0.0040  |
| A2 | 0 | 8  | 3 | 5  | A1 | 0 | 8  | 2 | 6  | 10255.0970 (0.002) | 0.0044  |
| B2 | 0 | 4  | 4 | 1  | B1 | 0 | 3  | 3 | 0  | 17221.0370 (0.002) | 0.0030  |
| A1 | 0 | 5  | 4 | 2  | A2 | 0 | 4  | 3 | 1  | 19528.7730 (0.002) | -0.0047 |
| B2 | 0 | 6  | 4 | 3  | B1 | 0 | 5  | 3 | 2  | 21198.5720 (0.002) | -0.0018 |
| A1 | 0 | 7  | 4 | 4  | A2 | 0 | 6  | 3 | 3  | 22431.1230 (0.002) | -0.0010 |
| B2 | 0 | 8  | 4 | 5  | B1 | 0 | 7  | 3 | 4  | 23620.4100 (0.002) | 0.0012  |
| A1 | 0 | 10 | 2 | 8  | A2 | 0 | 9  | 3 | 7  | 24811.8650 (0.002) | 0.0017  |
| A1 | 0 | 7  | 4 | 4  | A2 | 0 | 7  | 3 | 5  | 8797.5426 (0.002)  | 0.0020  |
| A1 | 0 | 9  | 4 | 6  | A2 | 0 | 9  | 3 | 7  | 12522.2201 (0.002) | 0.0027  |
| B2 | 0 | 5  | 4 | 1  | B1 | 0 | 4  | 3 | 2  | 21069.6850 (0.002) | 0.0000  |
| B1 | 0 | 5  | 5 | 0  | B2 | 0 | 4  | 4 | 1  | 21939.2140 (0.002) | -0.0012 |
| A2 | 0 | 6  | 3 | 3  | A1 | 0 | 5  | 4 | 2  | 15423.1802 (0.002) | -0.0033 |
| A2 | 0 | 8  | 3 | 5  | A1 | 0 | 7  | 4 | 4  | 22266.9196 (0.002) | -0.0011 |
| A2 | 0 | 7  | 5 | 3  | A1 | 0 | 7  | 4 | 4  | 7902.3806 (0.002)  | 0.0041  |
| A2 | 0 | 5  | 5 | 1  | A1 | 0 | 4  | 4 | 0  | 21847.3400 (0.002) | -0.0001 |
| B1 | 0 | 6  | 5 | 2  | B2 | 0 | 5  | 4 | 1  | 24435.4050 (0.002) | 0.0018  |
| A1 | 0 | 6  | 6 | 0  | A2 | 0 | 6  | 5 | 1  | 8487.5639 (0.002)  | -0.0059 |
| B2 | 0 | 7  | 4 | 3  | B1 | 0 | 6  | 5 | 2  | 16845.8636 (0.002) | 0.0018  |
| A1 | 0 | 8  | 4 | 4  | A2 | 0 | 7  | 5 | 3  | 21406.7351 (0.002) | -0.0035 |
| B2 | 0 | 8  | 6 | 3  | B1 | 0 | 8  | 5 | 4  | 8780.1893 (0.002)  | 0.0031  |

|    |   |    |   |    |    |   |    |   |    |                    |         |
|----|---|----|---|----|----|---|----|---|----|--------------------|---------|
| E2 | 1 | 2  | 1 | 2  | E2 | 1 | 1  | 0 | 1  | 6087.2890 (0.002)  | -0.0037 |
| E2 | 1 | 4  | 1 | 4  | E2 | 1 | 3  | 0 | 3  | 10389.3220 (0.002) | -0.0006 |
| E1 | 1 | 5  | 1 | 5  | E1 | 1 | 4  | 0 | 4  | 11892.4451 (0.002) | 0.0011  |
| E2 | 1 | 6  | 1 | 6  | E2 | 1 | 5  | 0 | 5  | 13340.4850 (0.002) | 0.0003  |
| E1 | 1 | 7  | 1 | 7  | E1 | 1 | 6  | 0 | 6  | 15051.2920 (0.002) | 0.0000  |
| E2 | 1 | 8  | 1 | 8  | E2 | 1 | 7  | 0 | 7  | 16944.4190 (0.002) | -0.0003 |
| E1 | 1 | 9  | 1 | 9  | E1 | 1 | 8  | 0 | 8  | 18897.8165 (0.002) | 0.0000  |
| E2 | 1 | 10 | 1 | 10 | E2 | 1 | 9  | 0 | 9  | 20868.2258 (0.002) | -0.0009 |
| E1 | 1 | 11 | 1 | 11 | E1 | 1 | 10 | 0 | 10 | 22844.2687 (0.002) | -0.0010 |
| E2 | 1 | 12 | 1 | 12 | E2 | 1 | 11 | 0 | 11 | 24822.8419 (0.002) | -0.0001 |
|    |   |    |   |    |    |   |    |   |    |                    |         |
| E2 | 1 | 7  | 1 | 6  | E2 | 1 | 7  | 0 | 7  | 10859.7707 (0.002) | 0.0012  |
| E2 | 1 | 9  | 1 | 8  | E2 | 1 | 9  | 0 | 9  | 15842.5178 (0.002) | 0.0014  |
|    |   |    |   |    |    |   |    |   |    |                    |         |
| E1 | 1 | 4  | 0 | 4  | E1 | 1 | 3  | 1 | 3  | 6987.3722 (0.002)  | 0.0026  |
| E2 | 1 | 5  | 0 | 5  | E2 | 1 | 4  | 1 | 4  | 10198.5916 (0.002) | 0.0003  |
| E1 | 1 | 6  | 0 | 6  | E1 | 1 | 5  | 1 | 5  | 12752.1919 (0.002) | 0.0001  |
| E2 | 1 | 7  | 0 | 7  | E2 | 1 | 6  | 1 | 6  | 14902.3230 (0.002) | -0.0001 |
| E1 | 1 | 8  | 0 | 8  | E1 | 1 | 7  | 1 | 7  | 16913.1750 (0.002) | 0.0000  |
| E2 | 1 | 9  | 0 | 9  | E2 | 1 | 8  | 1 | 8  | 18891.9408 (0.002) | -0.0002 |
| E1 | 1 | 10 | 0 | 10 | E1 | 1 | 9  | 1 | 9  | 20867.1995 (0.002) | 0.0015  |
| E2 | 1 | 11 | 0 | 11 | E2 | 1 | 10 | 1 | 10 | 22844.0972 (0.002) | -0.0012 |
| E1 | 1 | 12 | 0 | 12 | E1 | 1 | 11 | 1 | 11 | 24822.8125 (0.002) | -0.0021 |
|    |   |    |   |    |    |   |    |   |    |                    |         |
| E2 | 1 | 2  | 2 | 1  | E2 | 1 | 1  | 1 | 0  | 6962.2023 (0.002)  | 0.0028  |
| E2 | 1 | 4  | 2 | 3  | E2 | 1 | 3  | 1 | 2  | 12784.9210 (0.002) | 0.0040  |
| E1 | 1 | 5  | 2 | 4  | E1 | 1 | 4  | 1 | 3  | 15456.4180 (0.002) | 0.0005  |
| E2 | 1 | 6  | 2 | 5  | E2 | 1 | 5  | 1 | 4  | 17562.2300 (0.002) | -0.0006 |
| E1 | 1 | 7  | 2 | 6  | E1 | 1 | 6  | 1 | 5  | 18881.1076 (0.002) | -0.0010 |
| E2 | 1 | 8  | 2 | 7  | E2 | 1 | 7  | 1 | 6  | 19905.6965 (0.002) | -0.0015 |
| E1 | 1 | 9  | 2 | 8  | E1 | 1 | 8  | 1 | 7  | 21286.8131 (0.002) | -0.0009 |
| E2 | 1 | 10 | 2 | 9  | E2 | 1 | 9  | 1 | 8  | 23040.1202 (0.002) | -0.0005 |
| E1 | 1 | 11 | 2 | 10 | E1 | 1 | 10 | 1 | 9  | 24940.9032 (0.002) | -0.0013 |
|    |   |    |   |    |    |   |    |   |    |                    |         |
| E2 | 1 | 4  | 2 | 3  | E2 | 1 | 4  | 1 | 4  | 8518.5291 (0.002)  | -0.0050 |
| E2 | 1 | 6  | 2 | 5  | E2 | 1 | 6  | 1 | 6  | 10200.2775 (0.002) | 0.0028  |
| E1 | 1 | 7  | 2 | 6  | E1 | 1 | 7  | 1 | 7  | 11847.1561 (0.002) | 0.0035  |
| E2 | 1 | 8  | 2 | 7  | E2 | 1 | 8  | 1 | 8  | 13821.0498 (0.002) | 0.0016  |
| E2 | 1 | 10 | 2 | 9  | E2 | 1 | 10 | 1 | 10 | 18014.4116 (0.002) | 0.0012  |
|    |   |    |   |    |    |   |    |   |    |                    |         |
| E2 | 1 | 3  | 2 | 1  | E2 | 1 | 3  | 1 | 2  | 8779.6542 (0.002)  | 0.0095  |
| E2 | 1 | 9  | 2 | 7  | E2 | 1 | 9  | 1 | 8  | 12161.1180 (0.002) | -0.0027 |
| E2 | 1 | 11 | 2 | 9  | E2 | 1 | 11 | 1 | 10 | 17531.4598 (0.002) | -0.0042 |
|    |   |    |   |    |    |   |    |   |    |                    |         |
| E2 | 1 | 5  | 1 | 4  | E2 | 1 | 4  | 1 | 4  | 16177.1212 (0.002) | 0.0011  |
|    |   |    |   |    |    |   |    |   |    |                    |         |
| E2 | 1 | 4  | 3 | 2  | E2 | 1 | 4  | 2 | 3  | 9742.6611 (0.002)  | 0.0003  |
| E1 | 1 | 5  | 3 | 3  | E1 | 1 | 5  | 2 | 4  | 10239.5750 (0.002) | 0.0027  |
| E1 | 1 | 7  | 3 | 5  | E1 | 1 | 7  | 2 | 6  | 11066.0051 (0.002) | 0.0001  |
| E2 | 1 | 8  | 3 | 6  | E2 | 1 | 8  | 2 | 7  | 12048.2467 (0.002) | -0.0025 |
|    |   |    |   |    |    |   |    |   |    |                    |         |
| E1 | 1 | 7  | 3 | 5  | E1 | 1 | 6  | 2 | 4  | 22311.8156 (0.002) | -0.0021 |
| E2 | 1 | 8  | 3 | 6  | E2 | 1 | 7  | 2 | 5  | 24499.3116 (0.002) | -0.0043 |
|    |   |    |   |    |    |   |    |   |    |                    |         |
| E1 | 1 | 6  | 1 | 5  | E1 | 1 | 5  | 2 | 4  | 11682.5470 (0.002) | -0.0014 |
| E2 | 1 | 7  | 1 | 6  | E2 | 1 | 6  | 2 | 5  | 15561.8180 (0.002) | 0.0001  |
| E1 | 1 | 8  | 1 | 7  | E1 | 1 | 7  | 2 | 6  | 18589.6372 (0.002) | 0.0010  |
| E2 | 1 | 9  | 1 | 8  | E2 | 1 | 8  | 2 | 7  | 20913.4104 (0.002) | 0.0012  |
| E1 | 1 | 10 | 1 | 9  | E1 | 1 | 9  | 2 | 8  | 22954.5080 (0.002) | -0.0008 |
| E2 | 1 | 11 | 1 | 10 | E2 | 1 | 10 | 2 | 9  | 24923.4842 (0.002) | -0.0019 |

|    |   |    |   |   |    |   |   |   |   |                    |         |
|----|---|----|---|---|----|---|---|---|---|--------------------|---------|
| E2 | 1 | 5  | 3 | 2 | E2 | 1 | 5 | 2 | 3 | 10651.2463 (0.002) | 0.0022  |
| E1 | 1 | 6  | 3 | 3 | E1 | 1 | 6 | 2 | 4 | 10984.7166 (0.002) | 0.0027  |
| E2 | 1 | 7  | 3 | 4 | E2 | 1 | 7 | 2 | 5 | 10585.9296 (0.002) | 0.0023  |
| E2 | 1 | 3  | 3 | 0 | E2 | 1 | 2 | 2 | 1 | 18038.7706 (0.010) | -0.0012 |
| E2 | 1 | 7  | 2 | 5 | E2 | 1 | 6 | 2 | 5 | 23016.4464 (0.002) | -0.0029 |
| E2 | 1 | 5  | 4 | 1 | E2 | 1 | 5 | 3 | 2 | 10227.8840 (0.002) | -0.0020 |
| E1 | 1 | 6  | 4 | 2 | E1 | 1 | 6 | 3 | 3 | 11676.2812 (0.002) | 0.0005  |
| E2 | 1 | 7  | 4 | 3 | E2 | 1 | 7 | 3 | 4 | 12501.1035 (0.002) | 0.0006  |
| E2 | 1 | 9  | 4 | 5 | E2 | 1 | 9 | 3 | 6 | 12377.0149 (0.002) | 0.0001  |
| E2 | 1 | 4  | 4 | 1 | E2 | 1 | 3 | 3 | 0 | 15275.7366 (0.002) | 0.0038  |
| E1 | 1 | 5  | 4 | 2 | E1 | 1 | 4 | 3 | 1 | 17658.5800 (0.002) | 0.0041  |
| E2 | 1 | 6  | 4 | 3 | E2 | 1 | 5 | 3 | 2 | 20526.8258 (0.002) | 0.0010  |
| E1 | 1 | 7  | 4 | 4 | E1 | 1 | 6 | 3 | 3 | 23452.8368 (0.002) | -0.0034 |
| E1 | 1 | 8  | 2 | 6 | E1 | 1 | 7 | 3 | 5 | 16697.9088 (0.002) | -0.0001 |
| E2 | 1 | 9  | 2 | 7 | E2 | 1 | 8 | 3 | 6 | 21026.2843 (0.002) | 0.0036  |
| E1 | 1 | 10 | 2 | 8 | E1 | 1 | 9 | 3 | 7 | 24428.2364 (0.002) | 0.0040  |
| E1 | 1 | 5  | 4 | 2 | E1 | 1 | 5 | 3 | 3 | 10722.8960 (0.002) | -0.0039 |
| E2 | 1 | 6  | 4 | 3 | E2 | 1 | 6 | 3 | 4 | 11615.4529 (0.002) | 0.0014  |
| E1 | 1 | 7  | 4 | 4 | E1 | 1 | 7 | 3 | 5 | 12125.7369 (0.002) | 0.0004  |
| E2 | 1 | 8  | 4 | 5 | E2 | 1 | 8 | 3 | 6 | 12457.7841 (0.002) | -0.0041 |
| E2 | 1 | 7  | 5 | 2 | E2 | 1 | 7 | 4 | 3 | 12353.8773 (0.002) | -0.0011 |
| E1 | 1 | 5  | 5 | 1 | E1 | 1 | 4 | 4 | 0 | 19887.0356 (0.002) | -0.0055 |
| E2 | 1 | 6  | 5 | 2 | E2 | 1 | 5 | 4 | 1 | 21669.6732 (0.002) | -0.0015 |
| E1 | 1 | 7  | 5 | 3 | E1 | 1 | 6 | 4 | 2 | 24413.9916 (0.002) | -0.0037 |
| E2 | 1 | 6  | 5 | 2 | E2 | 1 | 6 | 4 | 3 | 11370.7300 (0.002) | -0.0059 |
| E2 | 1 | 8  | 5 | 4 | E2 | 1 | 8 | 4 | 5 | 13447.5100 (0.002) | 0.0019  |
| E2 | 1 | 5  | 4 | 1 | E2 | 1 | 4 | 4 | 1 | 18149.8765 (0.002) | 0.0112  |
| E1 | 1 | 6  | 4 | 2 | E1 | 1 | 5 | 4 | 2 | 21016.3692 (0.002) | 0.0025  |
| E2 | 1 | 7  | 4 | 3 | E2 | 1 | 6 | 4 | 3 | 23920.2723 (0.002) | -0.0032 |
| E2 | 1 | 9  | 3 | 6 | E2 | 1 | 8 | 4 | 5 | 17494.5451 (0.002) | -0.0018 |
| E2 | 1 | 5  | 5 | 0 | E2 | 1 | 4 | 4 | 1 | 24858.5476 (0.002) | -0.0013 |
| E2 | 1 | 7  | 5 | 2 | E2 | 1 | 6 | 5 | 2 | 24903.4203 (0.002) | 0.0024  |
| E2 | 2 | 9  | 1 | 9 | E2 | 2 | 8 | 0 | 8 | 19463.1213 (0.002) | 0.0025  |
| E2 | 2 | 5  | 2 | 4 | E2 | 2 | 4 | 1 | 3 | 15600.9320 (0.002) | -0.0083 |
| E2 | 2 | 6  | 1 | 5 | E2 | 2 | 5 | 1 | 5 | 17778.5195 (0.002) | 0.0029  |
| E2 | 2 | 5  | 3 | 3 | E2 | 2 | 4 | 2 | 2 | 16485.5760 (0.002) | 0.0055  |
| E2 | 2 | 7  | 3 | 5 | E2 | 2 | 6 | 2 | 4 | 22266.4936 (0.010) | -0.0026 |
| E2 | 2 | 6  | 2 | 4 | E2 | 2 | 5 | 2 | 4 | 18922.8913 (0.002) | -0.0072 |
| E2 | 2 | 8  | 2 | 6 | E2 | 2 | 7 | 2 | 6 | 24575.8030 (0.002) | 0.0032  |
| E2 | 2 | 6  | 3 | 3 | E2 | 2 | 5 | 3 | 3 | 19835.7953 (0.002) | 0.0017  |

E2 2 7 4 4 E2 2 6 3 3 23197.7720(0.002) 0.0001

**Table S6.** Rotational transitions of the parent species of 3,5-difluorotoluene sorted by branch, together with fit residuals (o.-c., frequencies in MHz). Rotational transitions labeled with symmetry species, free rotor quantum number ( $m$ ), and asymmetric rotor quantum numbers ( $J, K_a, K_c$ ).

| Upper level |    |    |     | Lower level |       |   |    | Measured(Unc. ) | o.-c. (MHz) |                    |         |
|-------------|----|----|-----|-------------|-------|---|----|-----------------|-------------|--------------------|---------|
| Sym'        | m' | J' | Ka' | Kc'         | Sym m | J | Ka | Kc              |             |                    |         |
| B2          | 0  | 3  | 0   | 3           | B1    | 0 | 2  | 0               | 2           | 6174.6440 (0.002)  | 0.0008  |
| B1          | 0  | 4  | 0   | 4           | B2    | 0 | 3  | 0               | 3           | 7938.7798 (0.002)  | -0.0003 |
| B2          | 0  | 5  | 0   | 5           | B1    | 0 | 4  | 0               | 4           | 9702.9157 (0.002)  | -0.0003 |
| B1          | 0  | 6  | 0   | 6           | B2    | 0 | 5  | 0               | 5           | 11467.0502 (0.002) | -0.0006 |
| B2          | 0  | 7  | 0   | 7           | B1    | 0 | 6  | 0               | 6           | 13231.1836 (0.002) | -0.0006 |
| B1          | 0  | 8  | 0   | 8           | B2    | 0 | 7  | 0               | 7           | 14995.3156 (0.002) | -0.0004 |
| B2          | 0  | 9  | 0   | 9           | B1    | 0 | 8  | 0               | 8           | 16759.4461 (0.002) | 0.0000  |
| B1          | 0  | 10 | 0   | 10          | B2    | 0 | 9  | 0               | 9           | 18523.5742 (0.002) | 0.0000  |
| B2          | 0  | 11 | 0   | 11          | B1    | 0 | 10 | 0               | 10          | 20287.7001 (0.002) | 0.0001  |
| B1          | 0  | 12 | 0   | 12          | B2    | 0 | 11 | 0               | 11          | 22051.8236 (0.002) | 0.0001  |
| B2          | 0  | 13 | 0   | 13          | B1    | 0 | 12 | 0               | 12          | 23815.9443 (0.002) | 0.0000  |
|             |    |    |     |             |       |   |    |                 |             |                    |         |
| B1          | 0  | 7  | 1   | 6           | B2    | 0 | 7  | 0               | 7           | 11468.9288 (0.002) | -0.0017 |
| B2          | 0  | 8  | 1   | 7           | B1    | 0 | 8  | 0               | 8           | 13233.3680 (0.002) | -0.0036 |
| B1          | 0  | 9  | 1   | 8           | B2    | 0 | 9  | 0               | 9           | 14997.8102 (0.002) | 0.0006  |
|             |    |    |     |             |       |   |    |                 |             |                    |         |
| A2          | 0  | 3  | 1   | 3           | A1    | 0 | 2  | 1               | 2           | 6174.6440 (0.002)  | 0.0009  |
| A1          | 0  | 4  | 1   | 4           | A2    | 0 | 3  | 1               | 3           | 7938.7798 (0.002)  | -0.0003 |
| A2          | 0  | 5  | 1   | 5           | A1    | 0 | 4  | 1               | 4           | 9702.9157 (0.002)  | -0.0003 |
| A1          | 0  | 6  | 1   | 6           | A2    | 0 | 5  | 1               | 5           | 11467.0502 (0.002) | -0.0006 |
| A2          | 0  | 7  | 1   | 7           | A1    | 0 | 6  | 1               | 6           | 13231.1836 (0.002) | -0.0006 |
| A1          | 0  | 8  | 1   | 8           | A2    | 0 | 7  | 1               | 7           | 14995.3156 (0.002) | -0.0004 |
| A2          | 0  | 9  | 1   | 9           | A1    | 0 | 8  | 1               | 8           | 16759.4461 (0.002) | 0.0000  |
| A1          | 0  | 10 | 1   | 10          | A2    | 0 | 9  | 1               | 9           | 18523.5742 (0.002) | 0.0000  |
| A2          | 0  | 11 | 1   | 11          | A1    | 0 | 10 | 1               | 10          | 20287.7001 (0.002) | 0.0001  |
| A1          | 0  | 12 | 1   | 12          | A2    | 0 | 11 | 1               | 11          | 22051.8236 (0.002) | 0.0001  |
| A2          | 0  | 13 | 1   | 13          | A1    | 0 | 12 | 1               | 12          | 23815.9443 (0.002) | 0.0000  |
|             |    |    |     |             |       |   |    |                 |             |                    |         |
| B1          | 0  | 5  | 1   | 4           | B2    | 0 | 4  | 1               | 3           | 11467.3651 (0.002) | -0.0003 |
| B2          | 0  | 6  | 1   | 5           | B1    | 0 | 5  | 1               | 4           | 13231.4976 (0.002) | -0.0001 |
| B1          | 0  | 7  | 1   | 6           | B2    | 0 | 6  | 1               | 5           | 14995.6283 (0.002) | 0.0000  |
| B2          | 0  | 8  | 1   | 7           | B1    | 0 | 7  | 1               | 6           | 16759.7571 (0.002) | -0.0001 |
| B1          | 0  | 9  | 1   | 8           | B2    | 0 | 8  | 1               | 7           | 18523.8840 (0.002) | -0.0001 |
| B2          | 0  | 10 | 1   | 9           | B1    | 0 | 9  | 1               | 8           | 20288.0096 (0.002) | 0.0009  |
| B1          | 0  | 11 | 1   | 10          | B2    | 0 | 10 | 1               | 9           | 22052.1316 (0.002) | 0.0007  |
|             |    |    |     |             |       |   |    |                 |             |                    |         |
| B1          | 0  | 3  | 3   | 0           | B2    | 0 | 2  | 1               | 1           | 11468.2560 (0.002) | -0.0023 |
|             |    |    |     |             |       |   |    |                 |             |                    |         |
| B1          | 0  | 8  | 2   | 6           | B2    | 0 | 8  | 1               | 7           | 11468.8906 (0.002) | 0.0010  |
| B2          | 0  | 9  | 2   | 7           | B1    | 0 | 9  | 1               | 8           | 13233.3186 (0.002) | 0.0000  |
| B1          | 0  | 10 | 2   | 8           | B2    | 0 | 10 | 1               | 9           | 14997.7447 (0.002) | 0.0019  |
|             |    |    |     |             |       |   |    |                 |             |                    |         |
| A1          | 0  | 7  | 2   | 6           | A2    | 0 | 7  | 1               | 7           | 11468.9288 (0.002) | -0.0017 |
| A2          | 0  | 8  | 2   | 7           | A1    | 0 | 8  | 1               | 8           | 13233.3680 (0.002) | -0.0036 |
| A1          | 0  | 9  | 2   | 8           | A2    | 0 | 9  | 1               | 9           | 14997.8102 (0.002) | 0.0006  |

|    |   |    |   |    |    |   |    |   |   |                    |         |
|----|---|----|---|----|----|---|----|---|---|--------------------|---------|
| B1 | 0 | 9  | 3 | 6  | B2 | 0 | 9  | 2 | 7 | 11468.8455 (0.002) | 0.0018  |
| B2 | 0 | 10 | 3 | 7  | B1 | 0 | 10 | 2 | 8 | 13233.2581 (0.002) | -0.0016 |
| B1 | 0 | 11 | 3 | 8  | B2 | 0 | 11 | 2 | 9 | 14997.6697 (0.002) | 0.0003  |
|    |   |    |   |    |    |   |    |   |   |                    |         |
| B2 | 0 | 5  | 2 | 3  | B1 | 0 | 4  | 2 | 2 | 13231.8111 (0.002) | -0.0012 |
| B1 | 0 | 6  | 2 | 4  | B2 | 0 | 5  | 2 | 3 | 14995.9396 (0.002) | -0.0001 |
| B2 | 0 | 7  | 2 | 5  | B1 | 0 | 6  | 2 | 4 | 16760.0662 (0.002) | 0.0000  |
| B1 | 0 | 8  | 2 | 6  | B2 | 0 | 7  | 2 | 5 | 18524.1909 (0.002) | 0.0002  |
| B2 | 0 | 9  | 2 | 7  | B1 | 0 | 8  | 2 | 6 | 20288.3136 (0.002) | 0.0005  |
| B1 | 0 | 10 | 2 | 8  | B2 | 0 | 9  | 2 | 7 | 22052.4334 (0.002) | 0.0005  |
|    |   |    |   |    |    |   |    |   |   |                    |         |
| A1 | 0 | 8  | 3 | 6  | A2 | 0 | 8  | 2 | 7 | 11468.8906 (0.002) | 0.0010  |
| A2 | 0 | 9  | 3 | 7  | A1 | 0 | 9  | 2 | 8 | 13233.3186 (0.002) | 0.0000  |
| A1 | 0 | 10 | 3 | 8  | A2 | 0 | 10 | 2 | 9 | 14997.7447 (0.002) | 0.0019  |
|    |   |    |   |    |    |   |    |   |   |                    |         |
| A1 | 0 | 5  | 2 | 4  | A2 | 0 | 4  | 2 | 3 | 11467.3651 (0.002) | -0.0003 |
| A2 | 0 | 6  | 2 | 5  | A1 | 0 | 5  | 2 | 4 | 13231.4976 (0.002) | -0.0001 |
| A1 | 0 | 7  | 2 | 6  | A2 | 0 | 6  | 2 | 5 | 14995.6283 (0.002) | 0.0000  |
| A2 | 0 | 8  | 2 | 7  | A1 | 0 | 7  | 2 | 6 | 16759.7571 (0.002) | -0.0001 |
| A1 | 0 | 9  | 2 | 8  | A2 | 0 | 8  | 2 | 7 | 18523.8840 (0.002) | -0.0001 |
| A2 | 0 | 10 | 2 | 9  | A1 | 0 | 9  | 2 | 8 | 20288.0096 (0.002) | 0.0009  |
| A1 | 0 | 11 | 2 | 10 | A2 | 0 | 10 | 2 | 9 | 22052.1316 (0.002) | 0.0007  |
|    |   |    |   |    |    |   |    |   |   |                    |         |
| A1 | 0 | 4  | 4 | 0  | A2 | 0 | 3  | 2 | 1 | 14997.0908 (0.002) | 0.0041  |
|    |   |    |   |    |    |   |    |   |   |                    |         |
| A1 | 0 | 4  | 3 | 2  | A2 | 0 | 3  | 2 | 1 | 11468.1892 (0.002) | 0.0032  |
|    |   |    |   |    |    |   |    |   |   |                    |         |
| B1 | 0 | 10 | 4 | 6  | B2 | 0 | 10 | 3 | 7 | 11468.7896 (0.002) | -0.0030 |
| B2 | 0 | 11 | 4 | 7  | B1 | 0 | 11 | 3 | 8 | 13233.1946 (0.002) | -0.0004 |
| B1 | 0 | 12 | 4 | 8  | B2 | 0 | 12 | 3 | 9 | 14997.5889 (0.002) | -0.0005 |
|    |   |    |   |    |    |   |    |   |   |                    |         |
| B1 | 0 | 7  | 3 | 4  | B2 | 0 | 6  | 3 | 3 | 18524.5003 (0.002) | 0.0003  |
| B2 | 0 | 8  | 3 | 5  | B1 | 0 | 7  | 3 | 4 | 20288.6189 (0.002) | 0.0001  |
| B1 | 0 | 9  | 3 | 6  | B2 | 0 | 8  | 3 | 5 | 22052.7358 (0.002) | 0.0006  |
|    |   |    |   |    |    |   |    |   |   |                    |         |
| A2 | 0 | 5  | 3 | 3  | A1 | 0 | 4  | 3 | 2 | 13231.8111 (0.002) | 0.0007  |
| A1 | 0 | 6  | 3 | 4  | A2 | 0 | 5  | 3 | 3 | 14995.9396 (0.002) | -0.0001 |
| A2 | 0 | 7  | 3 | 5  | A1 | 0 | 6  | 3 | 4 | 16760.0662 (0.002) | 0.0000  |
| A1 | 0 | 8  | 3 | 6  | A2 | 0 | 7  | 3 | 5 | 18524.1909 (0.002) | 0.0002  |
| A2 | 0 | 9  | 3 | 7  | A1 | 0 | 8  | 3 | 6 | 20288.3136 (0.002) | 0.0005  |
| A1 | 0 | 10 | 3 | 8  | A2 | 0 | 9  | 3 | 7 | 22052.4334 (0.002) | 0.0005  |
|    |   |    |   |    |    |   |    |   |   |                    |         |
| B1 | 0 | 5  | 4 | 2  | B2 | 0 | 4  | 3 | 1 | 14997.0908 (0.002) | 0.0015  |
| A2 | 0 | 6  | 4 | 3  | A1 | 0 | 5  | 3 | 2 | 16760.3832 (0.002) | 0.0020  |
|    |   |    |   |    |    |   |    |   |   |                    |         |
| A1 | 0 | 9  | 4 | 6  | A2 | 0 | 9  | 3 | 7 | 11468.8455 (0.002) | 0.0018  |
| A2 | 0 | 10 | 4 | 7  | A1 | 0 | 10 | 3 | 8 | 13233.2581 (0.002) | -0.0016 |
| A1 | 0 | 11 | 4 | 8  | A2 | 0 | 11 | 3 | 9 | 14997.6697 (0.002) | 0.0003  |
|    |   |    |   |    |    |   |    |   |   |                    |         |
| A1 | 0 | 7  | 4 | 4  | A2 | 0 | 6  | 4 | 3 | 18524.5003 (0.002) | 0.0003  |
| A2 | 0 | 8  | 4 | 5  | A1 | 0 | 7  | 4 | 4 | 20288.6189 (0.002) | 0.0001  |
| A1 | 0 | 9  | 4 | 6  | A2 | 0 | 8  | 4 | 5 | 22052.7358 (0.002) | 0.0006  |
|    |   |    |   |    |    |   |    |   |   |                    |         |
| A1 | 0 | 10 | 5 | 6  | A2 | 0 | 10 | 4 | 7 | 11468.7896 (0.002) | -0.0030 |
| A2 | 0 | 11 | 5 | 7  | A1 | 0 | 11 | 4 | 8 | 13233.1946 (0.002) | -0.0004 |
| A1 | 0 | 12 | 5 | 8  | A2 | 0 | 12 | 4 | 9 | 14997.5889 (0.002) | -0.0005 |
|    |   |    |   |    |    |   |    |   |   |                    |         |
| B2 | 0 | 6  | 3 | 3  | B1 | 0 | 5  | 4 | 2 | 16760.3739 (0.002) | -0.0029 |
|    |   |    |   |    |    |   |    |   |   |                    |         |
| B1 | 0 | 11 | 5 | 6  | B2 | 0 | 11 | 4 | 7 | 11468.7355 (0.002) | -0.0010 |
| B2 | 0 | 12 | 5 | 7  | B1 | 0 | 12 | 4 | 8 | 13233.1250 (0.002) | 0.0007  |

|    |   |    |    |    |    |   |    |   |    |                   |         |
|----|---|----|----|----|----|---|----|---|----|-------------------|---------|
| B1 | 0 | 13 | 5  | 8  | B2 | 0 | 13 | 4 | 9  | 14997.5024(0.002) | -0.0002 |
| A1 | 0 | 11 | 6  | 6  | A2 | 0 | 11 | 5 | 7  | 11468.7355(0.002) | -0.0010 |
| A2 | 0 | 12 | 6  | 7  | A1 | 0 | 12 | 5 | 8  | 13233.1250(0.002) | 0.0007  |
| A1 | 0 | 13 | 6  | 8  | A2 | 0 | 13 | 5 | 9  | 14997.5024(0.002) | -0.0002 |
| B1 | 0 | 12 | 6  | 6  | B2 | 0 | 12 | 5 | 7  | 11468.6757(0.002) | 0.0005  |
| B2 | 0 | 13 | 6  | 7  | B1 | 0 | 13 | 5 | 8  | 13233.0476(0.002) | -0.0001 |
| B1 | 0 | 14 | 6  | 8  | B2 | 0 | 14 | 5 | 9  | 14997.4095(0.002) | 0.0003  |
| A1 | 0 | 12 | 7  | 6  | A2 | 0 | 12 | 6 | 7  | 11468.6757(0.002) | 0.0005  |
| A2 | 0 | 13 | 7  | 7  | A1 | 0 | 13 | 6 | 8  | 13233.0476(0.002) | -0.0001 |
| A1 | 0 | 14 | 7  | 8  | A2 | 0 | 14 | 6 | 9  | 14997.4095(0.002) | 0.0003  |
| B1 | 0 | 13 | 7  | 6  | B2 | 0 | 13 | 6 | 7  | 11468.6080(0.002) | -0.0009 |
| B1 | 0 | 15 | 7  | 8  | B2 | 0 | 15 | 6 | 9  | 14997.3089(0.002) | -0.0002 |
| A1 | 0 | 13 | 8  | 6  | A2 | 0 | 13 | 7 | 7  | 11468.6080(0.002) | -0.0009 |
| A1 | 0 | 15 | 8  | 8  | A2 | 0 | 15 | 7 | 9  | 14997.3089(0.002) | -0.0002 |
| B1 | 0 | 14 | 8  | 6  | B2 | 0 | 14 | 7 | 7  | 11468.5383(0.002) | 0.0009  |
| B2 | 0 | 15 | 8  | 7  | B1 | 0 | 15 | 7 | 8  | 13232.8769(0.002) | -0.0001 |
| A1 | 0 | 14 | 9  | 6  | A2 | 0 | 14 | 8 | 7  | 11468.5383(0.002) | 0.0009  |
| A2 | 0 | 15 | 9  | 7  | A1 | 0 | 15 | 8 | 8  | 13232.8769(0.002) | -0.0001 |
| B1 | 0 | 15 | 9  | 6  | B2 | 0 | 15 | 8 | 7  | 11468.4613(0.002) | 0.0005  |
| A1 | 0 | 15 | 10 | 6  | A2 | 0 | 15 | 9 | 7  | 11468.4613(0.002) | 0.0005  |
| E2 | 1 | 10 | 0  | 10 | E2 | 1 | 9  | 0 | 9  | 18545.9842(0.002) | -0.0006 |
| E2 | 1 | 11 | 0  | 11 | E2 | 1 | 10 | 0 | 10 | 20305.6635(0.002) | 0.0001  |
| E2 | 1 | 12 | 0  | 12 | E2 | 1 | 11 | 0 | 11 | 22066.5509(0.002) | -0.0024 |
| E2 | 1 | 13 | 0  | 13 | E2 | 1 | 12 | 0 | 12 | 23828.2453(0.002) | 0.0002  |
| E1 | 1 | 3  | 1  | 3  | E1 | 1 | 2  | 0 | 2  | 7157.5945(0.002)  | 0.0008  |
| E2 | 1 | 4  | 1  | 4  | E2 | 1 | 3  | 0 | 3  | 8719.2607(0.002)  | 0.0004  |
| E1 | 1 | 5  | 1  | 5  | E1 | 1 | 4  | 0 | 4  | 9997.5114(0.002)  | 0.0027  |
| E2 | 1 | 6  | 1  | 6  | E2 | 1 | 5  | 0 | 5  | 11564.5157(0.002) | 0.0009  |
| E1 | 1 | 7  | 1  | 7  | E1 | 1 | 6  | 0 | 6  | 13286.2219(0.002) | -0.0006 |
| E2 | 1 | 8  | 1  | 8  | E2 | 1 | 7  | 0 | 7  | 15033.8052(0.002) | 0.0031  |
| E1 | 1 | 9  | 1  | 9  | E1 | 1 | 8  | 0 | 8  | 16788.2340(0.002) | -0.0012 |
| E2 | 1 | 7  | 1  | 6  | E2 | 1 | 7  | 0 | 7  | 10682.6720(0.002) | 0.0060  |
| E2 | 1 | 9  | 1  | 8  | E2 | 1 | 9  | 0 | 9  | 14464.7536(0.002) | -0.0018 |
| E2 | 1 | 10 | 1  | 9  | E2 | 1 | 10 | 0 | 10 | 16300.7707(0.002) | 0.0019  |
| E1 | 1 | 10 | 1  | 10 | E1 | 1 | 9  | 1 | 9  | 18545.9842(0.002) | -0.0006 |
| E1 | 1 | 11 | 1  | 11 | E1 | 1 | 10 | 1 | 10 | 20305.6635(0.002) | 0.0001  |
| E1 | 1 | 12 | 1  | 12 | E1 | 1 | 11 | 1 | 11 | 22066.5509(0.002) | -0.0024 |
| E1 | 1 | 13 | 1  | 13 | E1 | 1 | 12 | 1 | 12 | 23828.2453(0.002) | 0.0002  |
| E2 | 1 | 6  | 2  | 5  | E2 | 1 | 6  | 1 | 6  | 8769.3315(0.002)  | 0.0019  |
| E2 | 1 | 8  | 2  | 7  | E2 | 1 | 8  | 1 | 8  | 12601.6664(0.002) | 0.0021  |
| E1 | 1 | 9  | 2  | 8  | E1 | 1 | 9  | 1 | 9  | 14464.7654(0.002) | -0.0039 |
| E1 | 1 | 10 | 2  | 9  | E1 | 1 | 10 | 1 | 10 | 16300.7707(0.002) | 0.0022  |
| E2 | 1 | 10 | 1  | 9  | E2 | 1 | 9  | 1 | 8  | 20381.9976(0.002) | -0.0006 |
| E2 | 1 | 11 | 1  | 10 | E2 | 1 | 10 | 1 | 9  | 22124.4842(0.002) | 0.0001  |
| E1 | 1 | 4  | 0  | 4  | E1 | 1 | 3  | 1 | 3  | 7359.0809(0.002)  | -0.0030 |

|    |   |    |   |    |    |   |    |   |   |                    |         |
|----|---|----|---|----|----|---|----|---|---|--------------------|---------|
| E2 | 1 | 5  | 0 | 5  | E2 | 1 | 4  | 1 | 4 | 9709.1838 (0.002)  | -0.0025 |
| E1 | 1 | 6  | 0 | 6  | E1 | 1 | 5  | 1 | 5 | 11538.7194 (0.002) | -0.0019 |
| E2 | 1 | 7  | 0 | 7  | E2 | 1 | 6  | 1 | 6 | 13284.9587 (0.002) | -0.0008 |
| E1 | 1 | 8  | 0 | 8  | E1 | 1 | 7  | 1 | 7 | 15033.7583 (0.002) | -0.0036 |
| E2 | 1 | 9  | 0 | 9  | E2 | 1 | 8  | 1 | 8 | 16788.2340 (0.002) | -0.0003 |
| E1 | 1 | 7  | 2 | 6  | E1 | 1 | 6  | 1 | 5 | 15408.4296 (0.002) | 0.0032  |
| E2 | 1 | 8  | 2 | 7  | E2 | 1 | 7  | 1 | 6 | 16952.8008 (0.002) | 0.0004  |
| E1 | 1 | 9  | 2 | 8  | E1 | 1 | 8  | 1 | 7 | 18651.8641 (0.002) | -0.0005 |
| E2 | 1 | 9  | 2 | 7  | E2 | 1 | 9  | 1 | 8 | 12420.9640 (0.002) | -0.0006 |
| E2 | 1 | 10 | 3 | 8  | E2 | 1 | 10 | 1 | 9 | 14335.9283 (0.002) | -0.0013 |
| E1 | 1 | 10 | 2 | 9  | E1 | 1 | 9  | 2 | 8 | 20381.9866 (0.002) | 0.0027  |
| E1 | 1 | 11 | 2 | 10 | E1 | 1 | 10 | 2 | 9 | 22124.4842 (0.002) | -0.0002 |
| E2 | 1 | 7  | 1 | 6  | E2 | 1 | 6  | 2 | 5 | 15198.2922 (0.002) | -0.0038 |
| E1 | 1 | 8  | 1 | 7  | E1 | 1 | 7  | 2 | 6 | 16938.9423 (0.002) | -0.0008 |
| E2 | 1 | 9  | 1 | 8  | E2 | 1 | 8  | 2 | 7 | 18651.3250 (0.002) | -0.0004 |
| E1 | 1 | 10 | 2 | 8  | E1 | 1 | 10 | 2 | 9 | 14335.8159 (0.002) | 0.0003  |
| E2 | 1 | 8  | 3 | 6  | E2 | 1 | 8  | 2 | 7 | 10453.9947 (0.002) | -0.0002 |
| E1 | 1 | 9  | 3 | 7  | E1 | 1 | 9  | 2 | 8 | 12424.6128 (0.002) | -0.0012 |
| E2 | 1 | 8  | 4 | 5  | E2 | 1 | 8  | 3 | 6 | 8542.5154 (0.002)  | 0.0013  |
| E1 | 1 | 10 | 2 | 8  | E1 | 1 | 9  | 3 | 7 | 22293.1862 (0.002) | 0.0007  |
| E2 | 1 | 6  | 5 | 2  | E2 | 1 | 6  | 4 | 3 | 10678.2273 (0.002) | -0.0007 |
| E1 | 1 | 8  | 3 | 5  | E1 | 1 | 7  | 4 | 4 | 17636.3211 (0.002) | 0.0006  |
| E2 | 2 | 9  | 1 | 9  | E2 | 2 | 8  | 0 | 8 | 16912.6245 (0.002) | 0.0008  |
| E2 | 2 | 6  | 2 | 4  | E2 | 2 | 5  | 2 | 4 | 16011.6707 (0.002) | -0.0009 |
| E2 | 2 | 6  | 3 | 3  | E2 | 2 | 5  | 3 | 3 | 16425.3845 (0.002) | 0.0016  |



**Table S7.** Rotational transitions of the  $^{13}\text{C}$  (2) and  $^{13}\text{C}$ (6) isotopologues of 2,6-difluorotoluene.

| Upper level |    |     |     | Lower level |    |    |    | Measured (Unc. ) o.-c. (MHz) |    |                    |         |
|-------------|----|-----|-----|-------------|----|----|----|------------------------------|----|--------------------|---------|
| Sym'm'      | J' | Ka' | Kc' | Sym m       | J  | Ka | Kc |                              |    |                    |         |
| A1          | 0  | 10  | 0   | 10          | A2 | 0  | 9  | 0                            | 9  | 20776.9300 (0.002) | -0.0007 |
| A2          | 0  | 11  | 0   | 11          | A1 | 0  | 10 | 0                            | 10 | 22755.6030 (0.002) | -0.0005 |
| A1          | 0  | 12  | 0   | 12          | A2 | 0  | 11 | 0                            | 11 | 24734.2880 (0.002) | 0.0013  |
| A1          | 0  | 4   | 1   | 4           | A2 | 0  | 3  | 0                            | 3  | 8934.7930 (0.002)  | 0.0008  |
| A2          | 0  | 5   | 1   | 5           | A1 | 0  | 4  | 0                            | 4  | 10890.0030 (0.002) | -0.0016 |
| A1          | 0  | 6   | 1   | 6           | A2 | 0  | 5  | 0                            | 5  | 12863.6408 (0.002) | 0.0002  |
| A2          | 0  | 7   | 1   | 7           | A1 | 0  | 6  | 0                            | 6  | 14841.2580 (0.002) | 0.0010  |
| A1          | 0  | 8   | 1   | 8           | A2 | 0  | 7  | 0                            | 7  | 16819.6780 (0.002) | -0.0011 |
| A2          | 0  | 9   | 1   | 9           | A1 | 0  | 8  | 0                            | 8  | 18798.2808 (0.002) | 0.0016  |
| A2          | 0  | 3   | 0   | 3           | A1 | 0  | 2  | 1                            | 2  | 6810.8930 (0.002)  | -0.0008 |
| A1          | 0  | 4   | 0   | 4           | A2 | 0  | 3  | 1                            | 3  | 8879.5760 (0.002)  | -0.0002 |
| A2          | 0  | 5   | 0   | 5           | A1 | 0  | 4  | 1                            | 4  | 10879.0750 (0.002) | -0.0005 |
| A1          | 0  | 6   | 0   | 6           | A2 | 0  | 5  | 1                            | 5  | 12861.6780 (0.002) | -0.0007 |
| A2          | 0  | 7   | 0   | 7           | A1 | 0  | 6  | 1                            | 6  | 14840.9260 (0.002) | 0.0002  |
| A1          | 0  | 8   | 0   | 8           | A2 | 0  | 7  | 1                            | 7  | 16819.6250 (0.002) | -0.0005 |
| A2          | 0  | 9   | 0   | 9           | A1 | 0  | 8  | 1                            | 8  | 18798.2697 (0.002) | -0.0011 |
| A1          | 0  | 10  | 1   | 10          | A2 | 0  | 9  | 1                            | 9  | 20776.9300 (0.002) | 0.0003  |
| A2          | 0  | 11  | 1   | 11          | A1 | 0  | 10 | 1                            | 10 | 22755.6030 (0.002) | -0.0004 |
| A1          | 0  | 12  | 1   | 12          | A2 | 0  | 11 | 1                            | 11 | 24734.2880 (0.002) | 0.0013  |
| A1          | 0  | 5   | 2   | 4           | A2 | 0  | 4  | 1                            | 3  | 13070.7745 (0.002) | -0.0004 |
| A2          | 0  | 6   | 2   | 5           | A1 | 0  | 5  | 1                            | 4  | 14902.6939 (0.002) | 0.0001  |
| A1          | 0  | 7   | 2   | 6           | A2 | 0  | 6  | 1                            | 5  | 16838.0810 (0.002) | -0.0001 |
| A2          | 0  | 8   | 2   | 7           | A1 | 0  | 7  | 1                            | 6  | 18805.4380 (0.002) | -0.0003 |
| A1          | 0  | 9   | 2   | 8           | A2 | 0  | 8  | 1                            | 7  | 20780.8510 (0.002) | 0.0009  |
| A2          | 0  | 3   | 3   | 1           | A1 | 0  | 2  | 2                            | 0  | 12514.6220 (0.002) | 0.0003  |
| A2          | 0  | 5   | 3   | 3           | A1 | 0  | 4  | 2                            | 2  | 16164.2806 (0.002) | -0.0016 |
| A1          | 0  | 6   | 3   | 4           | A2 | 0  | 5  | 2                            | 3  | 17539.6200 (0.002) | -0.0009 |
| A2          | 0  | 7   | 3   | 5           | A1 | 0  | 6  | 2                            | 4  | 19079.0945 (0.002) | 0.0047  |
| A1          | 0  | 8   | 3   | 6           | A2 | 0  | 7  | 2                            | 5  | 20872.0644 (0.002) | -0.0002 |
| A1          | 0  | 3   | 3   | 0           | A2 | 0  | 2  | 2                            | 1  | 13135.7850 (0.002) | -0.0038 |
| A2          | 0  | 4   | 3   | 1           | A1 | 0  | 3  | 2                            | 2  | 17249.9736 (0.002) | 0.0032  |
| A1          | 0  | 5   | 1   | 4           | A2 | 0  | 4  | 2                            | 3  | 12698.3172 (0.002) | -0.0022 |
| A2          | 0  | 6   | 1   | 5           | A1 | 0  | 5  | 2                            | 4  | 14806.5420 (0.002) | -0.0010 |
| A1          | 0  | 7   | 1   | 6           | A2 | 0  | 6  | 2                            | 5  | 16816.8817 (0.002) | 0.0009  |
| A2          | 0  | 8   | 1   | 7           | A1 | 0  | 7  | 2                            | 6  | 18801.2000 (0.002) | -0.0007 |
| A1          | 0  | 9   | 1   | 8           | A2 | 0  | 8  | 2                            | 7  | 20780.0600 (0.002) | 0.0018  |
| A1          | 0  | 6   | 2   | 4           | A2 | 0  | 5  | 3                            | 3  | 16203.3522 (0.002) | -0.0014 |
| A2          | 0  | 7   | 2   | 5           | A1 | 0  | 6  | 3                            | 4  | 18629.5000 (0.002) | -0.0007 |
| A1          | 0  | 8   | 2   | 6           | A2 | 0  | 7  | 3                            | 5  | 20750.3864 (0.002) | -0.0005 |
| E           | 1  | 5   | 1   | 5           | E  | 1  | 4  | 0                            | 4  | 11875.7050 (0.002) | 0.0017  |
| E           | 1  | 6   | 1   | 6           | E  | 1  | 5  | 0                            | 5  | 13316.5432 (0.002) | 0.0017  |
| E           | 1  | 7   | 1   | 7           | E  | 1  | 6  | 0                            | 6  | 15016.3250 (0.002) | 0.0018  |
| E           | 1  | 8   | 1   | 8           | E  | 1  | 7  | 0                            | 7  | 16901.2020 (0.002) | 0.0003  |
| E           | 1  | 6   | 0   | 6           | E  | 1  | 5  | 1                            | 5  | 12708.6909 (0.002) | -0.0018 |

|   |   |   |   |   |   |   |   |   |   |                    |         |
|---|---|---|---|---|---|---|---|---|---|--------------------|---------|
| E | 1 | 7 | 0 | 7 | E | 1 | 6 | 1 | 6 | 14859.8670 (0.002) | 0.0002  |
| E | 1 | 8 | 0 | 8 | E | 1 | 7 | 1 | 7 | 16867.8428 (0.002) | -0.0009 |
| E | 1 | 9 | 0 | 9 | E | 1 | 8 | 1 | 8 | 18841.9953 (0.002) | 0.0002  |
| E | 1 | 4 | 2 | 3 | E | 1 | 3 | 1 | 2 | 12761.5351 (0.002) | -0.0025 |
| E | 1 | 5 | 2 | 4 | E | 1 | 4 | 1 | 3 | 15426.7443 (0.002) | -0.0015 |
| E | 1 | 6 | 2 | 5 | E | 1 | 5 | 1 | 4 | 17537.7435 (0.002) | 0.0013  |
| E | 1 | 7 | 2 | 6 | E | 1 | 6 | 1 | 5 | 18866.6509 (0.002) | 0.0006  |
| E | 1 | 8 | 2 | 7 | E | 1 | 7 | 1 | 6 | 19885.4907 (0.002) | 0.0004  |
| E | 1 | 9 | 2 | 8 | E | 1 | 8 | 1 | 7 | 21246.5109 (0.002) | 0.0002  |
| E | 1 | 3 | 1 | 2 | E | 1 | 2 | 1 | 2 | 9467.0763 (0.002)  | 0.0009  |
| E | 1 | 4 | 1 | 3 | E | 1 | 3 | 1 | 3 | 12479.2290 (0.002) | 0.0008  |
| E | 1 | 5 | 1 | 4 | E | 1 | 4 | 1 | 4 | 16117.3107 (0.002) | 0.0027  |
| E | 1 | 3 | 2 | 1 | E | 1 | 2 | 2 | 1 | 10343.6873 (0.002) | 0.0000  |
| E | 1 | 4 | 2 | 2 | E | 1 | 3 | 2 | 2 | 13265.8853 (0.002) | -0.0043 |
| E | 1 | 5 | 2 | 3 | E | 1 | 4 | 2 | 3 | 16192.2560 (0.002) | -0.0017 |
| E | 1 | 6 | 2 | 4 | E | 1 | 5 | 2 | 4 | 19265.3411 (0.002) | 0.0023  |
| E | 1 | 7 | 1 | 6 | E | 1 | 6 | 2 | 5 | 15465.9853 (0.002) | 0.0016  |
| E | 1 | 8 | 1 | 7 | E | 1 | 7 | 2 | 6 | 18513.4255 (0.002) | -0.0020 |
| E | 1 | 9 | 1 | 8 | E | 1 | 8 | 2 | 7 | 20849.5412 (0.002) | -0.0032 |
| E | 1 | 4 | 3 | 2 | E | 1 | 3 | 2 | 1 | 13729.7239 (0.002) | 0.0018  |

**Table S8.** Rotational transitions of the  $^{13}\text{C}$  (1) isotopologue of 2,6-difluorotoluene.

| Upper level |    |     |     | Lower level |    |    |    | Measured (Unc. ) o.-c. (MHz) |    |                    |         |
|-------------|----|-----|-----|-------------|----|----|----|------------------------------|----|--------------------|---------|
| Sym'm'      | J' | Ka' | Kc' | Sym m       | J  | Ka | Kc |                              |    |                    |         |
| B1          | 0  | 4   | 1   | 4           | B2 | 0  | 3  | 0                            | 3  | 8947.5178 (0.002)  | 0.0007  |
| A2          | 0  | 5   | 1   | 5           | A1 | 0  | 4  | 0                            | 4  | 10907.7892 (0.002) | -0.0003 |
| B1          | 0  | 6   | 1   | 6           | B2 | 0  | 5  | 0                            | 5  | 12885.2636 (0.002) | 0.0004  |
| A2          | 0  | 7   | 1   | 7           | A1 | 0  | 6  | 0                            | 6  | 14866.3536 (0.002) | 0.0012  |
| B1          | 0  | 8   | 1   | 8           | B2 | 0  | 7  | 0                            | 7  | 16848.1568 (0.002) | -0.0017 |
| A2          | 0  | 9   | 1   | 9           | A1 | 0  | 8  | 0                            | 8  | 18830.1239 (0.002) | 0.0018  |
|             |    |     |     |             |    |    |    |                              |    |                    |         |
| B1          | 0  | 10  | 0   | 10          | B2 | 0  | 9  | 0                            | 9  | 20812.1316 (0.002) | -0.0006 |
| B2          | 0  | 11  | 0   | 11          | B1 | 0  | 10 | 0                            | 10 | 22794.1617 (0.002) | 0.0003  |
|             |    |     |     |             |    |    |    |                              |    |                    |         |
| B2          | 0  | 6   | 2   | 5           | B1 | 0  | 5  | 1                            | 4  | 14922.0739 (0.002) | -0.0005 |
| A1          | 0  | 7   | 2   | 6           | A2 | 0  | 6  | 1                            | 5  | 16864.7469 (0.002) | -0.0016 |
| B2          | 0  | 8   | 2   | 7           | B1 | 0  | 7  | 1                            | 6  | 18836.6690 (0.002) | 0.0003  |
| A1          | 0  | 9   | 2   | 8           | A2 | 0  | 8  | 1                            | 7  | 20815.7814 (0.002) | 0.0013  |
|             |    |     |     |             |    |    |    |                              |    |                    |         |
| A1          | 0  | 10  | 1   | 10          | A2 | 0  | 9  | 1                            | 9  | 20812.1316 (0.002) | 0.0004  |
| A2          | 0  | 11  | 1   | 11          | A1 | 0  | 10 | 1                            | 10 | 22794.1617 (0.002) | 0.0002  |
|             |    |     |     |             |    |    |    |                              |    |                    |         |
| B2          | 0  | 3   | 0   | 3           | B1 | 0  | 2  | 1                            | 2  | 6829.2246 (0.002)  | -0.0006 |
| A1          | 0  | 4   | 0   | 4           | A2 | 0  | 3  | 1                            | 3  | 8896.7455 (0.002)  | 0.0002  |
| B2          | 0  | 5   | 0   | 5           | B1 | 0  | 4  | 1                            | 4  | 10898.0122 (0.002) | -0.0001 |
| A1          | 0  | 6   | 0   | 6           | A2 | 0  | 5  | 1                            | 5  | 12883.5573 (0.002) | 0.0017  |
| B2          | 0  | 7   | 0   | 7           | B1 | 0  | 6  | 1                            | 6  | 14866.0721 (0.002) | 0.0002  |
| A1          | 0  | 8   | 0   | 8           | A2 | 0  | 7  | 1                            | 7  | 16848.1139 (0.002) | -0.0004 |
| B2          | 0  | 9   | 0   | 9           | B1 | 0  | 8  | 1                            | 8  | 18830.1129 (0.002) | -0.0025 |
|             |    |     |     |             |    |    |    |                              |    |                    |         |
| B1          | 0  | 5   | 1   | 4           | B2 | 0  | 4  | 2                            | 3  | 12733.7656 (0.002) | -0.0005 |
| A2          | 0  | 6   | 1   | 5           | A1 | 0  | 5  | 2                            | 4  | 14835.8523 (0.002) | -0.0018 |
| B1          | 0  | 7   | 1   | 6           | B2 | 0  | 6  | 2                            | 5  | 16846.2624 (0.002) | -0.0002 |
| A2          | 0  | 8   | 1   | 7           | A1 | 0  | 7  | 2                            | 6  | 18833.0750 (0.002) | 0.0003  |
|             |    |     |     |             |    |    |    |                              |    |                    |         |
| A2          | 0  | 5   | 3   | 3           | A1 | 0  | 4  | 2                            | 2  | 16136.2159 (0.010) | -0.0001 |
| B1          | 0  | 6   | 3   | 4           | B2 | 0  | 5  | 2                            | 3  | 17522.4218 (0.010) | 0.0027  |
| A2          | 0  | 7   | 3   | 5           | A1 | 0  | 6  | 2                            | 4  | 19085.9826 (0.010) | 0.0023  |
| B1          | 0  | 8   | 3   | 6           | B2 | 0  | 7  | 2                            | 5  | 20897.5882 (0.002) | 0.0000  |
|             |    |     |     |             |    |    |    |                              |    |                    |         |
| A1          | 0  | 6   | 2   | 4           | A2 | 0  | 5  | 3                            | 3  | 16281.2322 (0.002) | 0.0002  |
| B2          | 0  | 7   | 2   | 5           | B1 | 0  | 6  | 3                            | 4  | 18680.7407 (0.002) | 0.0005  |
| A1          | 0  | 8   | 2   | 6           | A2 | 0  | 7  | 3                            | 5  | 20791.1189 (0.002) | 0.0006  |
|             |    |     |     |             |    |    |    |                              |    |                    |         |
| E1          | 1  | 5   | 1   | 5           | E1 | 1  | 4  | 0                            | 4  | 11873.7329 (0.002) | 0.0008  |
| E2          | 1  | 6   | 1   | 6           | E2 | 1  | 5  | 0                            | 5  | 13322.1086 (0.002) | 0.0008  |
| E1          | 1  | 7   | 1   | 7           | E1 | 1  | 6  | 0                            | 6  | 15034.4638 (0.002) | -0.0008 |
| E2          | 1  | 8   | 1   | 8           | E2 | 1  | 7  | 0                            | 7  | 16927.3320 (0.002) | 0.0000  |
| E1          | 1  | 9   | 1   | 9           | E1 | 1  | 8  | 0                            | 8  | 18879.3532 (0.002) | -0.0001 |
|             |    |     |     |             |    |    |    |                              |    |                    |         |
| E2          | 1  | 4   | 2   | 3           | E2 | 1  | 3  | 1                            | 2  | 12767.5067 (0.002) | -0.0002 |
| E1          | 1  | 5   | 2   | 4           | E1 | 1  | 4  | 1                            | 3  | 15436.0087 (0.002) | -0.0013 |
| E2          | 1  | 6   | 2   | 5           | E2 | 1  | 5  | 1                            | 4  | 17534.4046 (0.002) | 0.0000  |
| E1          | 1  | 7   | 2   | 6           | E1 | 1  | 6  | 1                            | 5  | 18845.4116 (0.002) | -0.0001 |
| E2          | 1  | 8   | 2   | 7           | E2 | 1  | 7  | 1                            | 6  | 19870.7551 (0.002) | 0.0005  |
|             |    |     |     |             |    |    |    |                              |    |                    |         |
| E2          | 1  | 3   | 1   | 2           | E2 | 1  | 2  | 1                            | 2  | 9470.0591 (0.002)  | 0.0007  |
| E1          | 1  | 4   | 1   | 3           | E1 | 1  | 3  | 1                            | 3  | 12497.4798 (0.002) | 0.0000  |

|    |   |   |   |   |    |   |   |   |   |                    |         |
|----|---|---|---|---|----|---|---|---|---|--------------------|---------|
| E2 | 1 | 5 | 0 | 5 | E2 | 1 | 4 | 1 | 4 | 10199.1274 (0.002) | 0.0011  |
| E1 | 1 | 6 | 0 | 6 | E1 | 1 | 5 | 1 | 5 | 12744.6144 (0.002) | -0.0012 |
| E2 | 1 | 7 | 0 | 7 | E2 | 1 | 6 | 1 | 6 | 14889.4069 (0.002) | 0.0000  |
| E1 | 1 | 8 | 0 | 8 | E1 | 1 | 7 | 1 | 7 | 16897.1535 (0.002) | -0.0004 |
| E2 | 1 | 9 | 0 | 9 | E2 | 1 | 8 | 1 | 8 | 18873.7246 (0.002) | -0.0001 |
|    |   |   |   |   |    |   |   |   |   |                    |         |
| E2 | 1 | 7 | 1 | 6 | E2 | 1 | 6 | 2 | 5 | 15573.4168 (0.002) | -0.0001 |
| E1 | 1 | 8 | 1 | 7 | E1 | 1 | 7 | 2 | 6 | 18584.6388 (0.002) | 0.0005  |
|    |   |   |   |   |    |   |   |   |   |                    |         |
| E1 | 1 | 4 | 2 | 2 | E1 | 1 | 3 | 2 | 2 | 13268.1832 (0.002) | -0.0002 |
| E2 | 1 | 5 | 2 | 3 | E2 | 1 | 4 | 2 | 3 | 16205.8536 (0.002) | 0.0008  |
|    |   |   |   |   |    |   |   |   |   |                    |         |
| E2 | 1 | 4 | 3 | 2 | E2 | 1 | 3 | 2 | 1 | 13725.8127 (0.002) | -0.0010 |
|    |   |   |   |   |    |   |   |   |   |                    |         |
| E1 | 1 | 4 | 3 | 1 | E1 | 1 | 3 | 3 | 1 | 14225.7354 (0.002) | 0.0007  |

**Table S9.** Rotational transitions of the  $^{13}\text{C}$  (3) and  $^{13}\text{C}$  (5) isotopologues of 2,6-difluorotoluene.

| Upper level |    |     |     | Lower level |    |    |    | Measured (Unc. ) o.-c. (MHz) |    |                   |         |
|-------------|----|-----|-----|-------------|----|----|----|------------------------------|----|-------------------|---------|
| Sym'm'      | J' | Ka' | Kc' | Sym m       | J  | Ka | Kc |                              |    |                   |         |
| A1          | 0  | 4   | 1   | 4           | A2 | 0  | 3  | 0                            | 3  | 8895.3999(0.002)  | 0.0003  |
| A2          | 0  | 5   | 1   | 5           | A1 | 0  | 4  | 0                            | 4  | 10844.6241(0.002) | 0.0005  |
| A1          | 0  | 6   | 1   | 6           | A2 | 0  | 5  | 0                            | 5  | 12810.7441(0.002) | 0.0001  |
| A2          | 0  | 7   | 1   | 7           | A1 | 0  | 6  | 0                            | 6  | 14780.3983(0.002) | -0.0007 |
| A1          | 0  | 8   | 1   | 8           | A2 | 0  | 7  | 0                            | 7  | 16750.7517(0.002) | -0.0008 |
| A2          | 0  | 9   | 1   | 9           | A1 | 0  | 8  | 0                            | 8  | 18721.2602(0.002) | 0.0008  |
|             |    |     |     |             |    |    |    |                              |    |                   |         |
| A1          | 0  | 10  | 0   | 10          | A2 | 0  | 9  | 0                            | 9  | 20691.8105(0.002) | -0.0009 |
| A2          | 0  | 11  | 0   | 11          | A1 | 0  | 10 | 0                            | 10 | 22662.3826(0.002) | 0.0000  |
| A1          | 0  | 12  | 0   | 12          | A2 | 0  | 11 | 0                            | 11 | 24632.9633(0.002) | 0.0001  |
|             |    |     |     |             |    |    |    |                              |    |                   |         |
| A2          | 0  | 3   | 0   | 3           | A1 | 0  | 2  | 1                            | 2  | 6790.8584(0.002)  | -0.0012 |
| A1          | 0  | 4   | 0   | 4           | A2 | 0  | 3  | 1                            | 3  | 8845.6556(0.002)  | 0.0000  |
| A2          | 0  | 5   | 0   | 5           | A1 | 0  | 4  | 1                            | 4  | 10835.0878(0.002) | -0.0015 |
| A1          | 0  | 6   | 0   | 6           | A2 | 0  | 5  | 1                            | 5  | 12809.0860(0.002) | -0.0005 |
| A2          | 0  | 7   | 0   | 7           | A1 | 0  | 6  | 1                            | 6  | 14780.1274(0.002) | -0.0006 |
| A1          | 0  | 8   | 0   | 8           | A2 | 0  | 7  | 1                            | 7  | 16750.7096(0.002) | -0.0004 |
| A2          | 0  | 9   | 0   | 9           | A1 | 0  | 8  | 1                            | 8  | 18721.2514(0.002) | -0.0015 |
|             |    |     |     |             |    |    |    |                              |    |                   |         |
| A1          | 0  | 10  | 1   | 10          | A2 | 0  | 9  | 1                            | 9  | 20691.8105(0.002) | -0.0002 |
| A2          | 0  | 11  | 1   | 11          | A1 | 0  | 10 | 1                            | 10 | 22662.3826(0.002) | 0.0001  |
| A1          | 0  | 12  | 1   | 12          | A2 | 0  | 11 | 1                            | 11 | 24632.9633(0.002) | 0.0002  |
|             |    |     |     |             |    |    |    |                              |    |                   |         |
| A2          | 0  | 4   | 2   | 3           | A1 | 0  | 3  | 1                            | 2  | 11345.0875(0.002) | -0.0011 |
| A1          | 0  | 5   | 2   | 4           | A2 | 0  | 4  | 1                            | 3  | 12999.3101(0.002) | 0.0001  |
| A2          | 0  | 6   | 2   | 5           | A1 | 0  | 5  | 1                            | 4  | 14834.8717(0.002) | 0.0002  |
| A1          | 0  | 7   | 2   | 6           | A2 | 0  | 6  | 1                            | 5  | 16766.9593(0.002) | 0.0000  |
| A2          | 0  | 8   | 2   | 7           | A1 | 0  | 7  | 1                            | 6  | 18727.6750(0.002) | 0.0009  |
| A1          | 0  | 9   | 2   | 8           | A2 | 0  | 8  | 1                            | 7  | 20695.3989(0.002) | 0.0001  |
| A2          | 0  | 10  | 2   | 9           | A1 | 0  | 9  | 1                            | 8  | 22664.8554(0.002) | 0.0017  |
|             |    |     |     |             |    |    |    |                              |    |                   |         |
| A1          | 0  | 5   | 1   | 4           | A2 | 0  | 4  | 2                            | 3  | 12662.4075(0.002) | -0.0008 |
| A2          | 0  | 6   | 1   | 5           | A1 | 0  | 5  | 2                            | 4  | 14750.7597(0.002) | -0.0005 |
| A1          | 0  | 7   | 1   | 6           | A2 | 0  | 6  | 2                            | 5  | 16749.0127(0.002) | 0.0008  |
| A2          | 0  | 8   | 1   | 7           | A1 | 0  | 7  | 2                            | 6  | 18724.2014(0.002) | 0.0002  |
| A1          | 0  | 9   | 1   | 8           | A2 | 0  | 8  | 2                            | 7  | 20694.7697(0.002) | -0.0007 |
| A2          | 0  | 10  | 1   | 9           | A1 | 0  | 9  | 2                            | 8  | 22664.7481(0.002) | 0.0026  |
|             |    |     |     |             |    |    |    |                              |    |                   |         |
| A2          | 0  | 3   | 3   | 1           | A1 | 0  | 2  | 2                            | 0  | 12407.7668(0.002) | 0.0004  |
| A2          | 0  | 5   | 3   | 3           | A1 | 0  | 4  | 2                            | 2  | 16033.7073(0.002) | 0.0008  |
| A1          | 0  | 6   | 3   | 4           | A2 | 0  | 5  | 2                            | 3  | 17413.4098(0.002) | 0.0004  |
| A2          | 0  | 7   | 3   | 5           | A1 | 0  | 6  | 2                            | 4  | 18971.5497(0.002) | 0.0005  |
| A1          | 0  | 8   | 3   | 6           | A2 | 0  | 7  | 2                            | 5  | 20775.2226(0.002) | 0.0004  |
|             |    |     |     |             |    |    |    |                              |    |                   |         |
| A1          | 0  | 3   | 3   | 0           | A2 | 0  | 2  | 2                            | 1  | 13048.4905(0.002) | -0.0022 |
|             |    |     |     |             |    |    |    |                              |    |                   |         |
| A1          | 0  | 6   | 2   | 4           | A2 | 0  | 5  | 3                            | 3  | 16195.3042(0.002) | -0.0004 |
| A2          | 0  | 7   | 2   | 5           | A1 | 0  | 6  | 3                            | 4  | 18575.8856(0.002) | -0.0003 |
| A1          | 0  | 8   | 2   | 6           | A2 | 0  | 7  | 3                            | 5  | 20671.7948(0.002) | 0.0013  |
|             |    |     |     |             |    |    |    |                              |    |                   |         |
| E           | 1  | 4   | 1   | 4           | E  | 1  | 3  | 0                            | 3  | 10310.2779(0.002) | -0.0014 |
| E           | 1  | 5   | 1   | 5           | E  | 1  | 4  | 0                            | 4  | 11800.9316(0.002) | -0.0020 |
| E           | 1  | 6   | 1   | 6           | E  | 1  | 5  | 0                            | 5  | 13241.9621(0.002) | -0.0022 |
| E           | 1  | 7   | 1   | 7           | E  | 1  | 6  | 0                            | 6  | 14946.2324(0.002) | -0.0011 |
| E           | 1  | 8   | 1   | 8           | E  | 1  | 7  | 0                            | 7  | 16829.0236(0.002) | 0.0003  |

|   |   |    |   |    |   |   |   |   |   |                    |         |
|---|---|----|---|----|---|---|---|---|---|--------------------|---------|
| E | 1 | 9  | 1 | 9  | E | 1 | 8 | 0 | 8 | 18770.0331 (0.002) | -0.0010 |
| E | 1 | 10 | 1 | 10 | E | 1 | 9 | 0 | 9 | 20727.4036 (0.002) | -0.0011 |
| E | 1 | 5  | 0 | 5  | E | 1 | 4 | 1 | 4 | 10146.0171 (0.002) | 0.0021  |
| E | 1 | 6  | 0 | 6  | E | 1 | 5 | 1 | 5 | 12673.5276 (0.002) | 0.0016  |
| E | 1 | 7  | 0 | 7  | E | 1 | 6 | 1 | 6 | 14804.0827 (0.002) | 0.0002  |
| E | 1 | 8  | 0 | 8  | E | 1 | 7 | 1 | 7 | 16799.5786 (0.002) | -0.0009 |
| E | 1 | 9  | 0 | 9  | E | 1 | 8 | 1 | 8 | 18764.5659 (0.002) | -0.0007 |
| E | 1 | 10 | 0 | 10 | E | 1 | 9 | 1 | 9 | 20726.4576 (0.002) | -0.0020 |
| E | 1 | 4  | 2 | 3  | E | 1 | 3 | 1 | 2 | 12690.8254 (0.002) | -0.0006 |
| E | 1 | 5  | 2 | 4  | E | 1 | 4 | 1 | 3 | 15343.6783 (0.002) | -0.0003 |
| E | 1 | 6  | 2 | 5  | E | 1 | 5 | 1 | 4 | 17426.8345 (0.002) | 0.0026  |
| E | 1 | 7  | 2 | 6  | E | 1 | 6 | 1 | 5 | 18726.5735 (0.002) | 0.0004  |
| E | 1 | 8  | 2 | 7  | E | 1 | 7 | 1 | 6 | 19747.0967 (0.002) | 0.0033  |
| E | 1 | 9  | 2 | 8  | E | 1 | 8 | 1 | 7 | 21131.5390 (0.002) | 0.0006  |
| E | 1 | 3  | 1 | 2  | E | 1 | 2 | 1 | 2 | 9412.8464 (0.002)  | -0.0011 |
| E | 1 | 4  | 1 | 3  | E | 1 | 3 | 1 | 3 | 12424.8396 (0.002) | -0.0021 |
| E | 1 | 5  | 1 | 4  | E | 1 | 4 | 1 | 4 | 16081.6829 (0.002) | -0.0005 |
| E | 1 | 7  | 1 | 6  | E | 1 | 6 | 2 | 5 | 15498.1552 (0.002) | 0.0016  |
| E | 1 | 8  | 1 | 7  | E | 1 | 7 | 2 | 6 | 18484.2001 (0.002) | 0.0008  |
| E | 1 | 9  | 1 | 8  | E | 1 | 8 | 2 | 7 | 20778.5214 (0.002) | 0.0000  |
| E | 1 | 10 | 1 | 9  | E | 1 | 9 | 2 | 8 | 22800.7052 (0.002) | 0.0007  |
| E | 1 | 3  | 2 | 1  | E | 1 | 2 | 2 | 1 | 10270.7840 (0.002) | 0.0015  |
| E | 1 | 4  | 2 | 2  | E | 1 | 3 | 2 | 2 | 13187.7304 (0.002) | 0.0006  |
| E | 1 | 5  | 2 | 3  | E | 1 | 4 | 2 | 3 | 16109.7445 (0.002) | -0.0006 |
| E | 1 | 6  | 2 | 4  | E | 1 | 5 | 2 | 4 | 19189.1987 (0.002) | -0.0022 |

**Table S10.** Rotational transitions of the  $^{13}\text{C}$  (4) isotopologue of 2,6-difluorotoluene.

| Upper level |    |     |     | Lower level |    |    |    | Measured (Unc. ) o.-c. (MHz) |    |                    |         |
|-------------|----|-----|-----|-------------|----|----|----|------------------------------|----|--------------------|---------|
| Sym'm'      | J' | Ka' | Kc' | Sym m       | J  | Ka | Kc |                              |    |                    |         |
| B1          | 0  | 10  | 0   | 10          | B2 | 0  | 9  | 0                            | 9  | 20652.3100 (0.002) | 0.0002  |
| B2          | 0  | 11  | 0   | 11          | B1 | 0  | 10 | 0                            | 10 | 22619.1275 (0.002) | 0.0003  |
| B1          | 0  | 4   | 1   | 4           | B2 | 0  | 3  | 0                            | 3  | 8873.4636 (0.002)  | -0.0001 |
| A2          | 0  | 5   | 1   | 5           | A1 | 0  | 4  | 0                            | 4  | 10822.6136 (0.002) | -0.0013 |
| B1          | 0  | 6   | 1   | 6           | B2 | 0  | 5  | 0                            | 5  | 12785.9606 (0.002) | -0.0001 |
| A2          | 0  | 7   | 1   | 7           | A1 | 0  | 6  | 0                            | 6  | 14752.0878 (0.002) | -0.0006 |
| B1          | 0  | 8   | 1   | 8           | B2 | 0  | 7  | 0                            | 7  | 16718.7398 (0.002) | -0.0008 |
| A2          | 0  | 9   | 1   | 9           | A1 | 0  | 8  | 0                            | 8  | 18685.5072 (0.002) | -0.0003 |
| B2          | 0  | 3   | 0   | 3           | B1 | 0  | 2  | 1                            | 2  | 6792.3986 (0.002)  | -0.0004 |
| B2          | 0  | 5   | 0   | 5           | B1 | 0  | 4  | 1                            | 4  | 10815.3739 (0.002) | -0.0004 |
| B2          | 0  | 7   | 0   | 7           | B1 | 0  | 6  | 1                            | 6  | 14751.9075 (0.002) | -0.0006 |
| A1          | 0  | 8   | 0   | 8           | A2 | 0  | 7  | 1                            | 7  | 16718.7141 (0.002) | -0.0001 |
| B2          | 0  | 9   | 0   | 9           | B1 | 0  | 8  | 1                            | 8  | 18685.5035 (0.002) | -0.0003 |
| A1          | 0  | 5   | 2   | 4           | A2 | 0  | 4  | 1                            | 3  | 12942.1351 (0.002) | -0.0005 |
| B2          | 0  | 6   | 2   | 5           | B1 | 0  | 5  | 1                            | 4  | 14794.9248 (0.002) | -0.0008 |
| A1          | 0  | 7   | 2   | 6           | A2 | 0  | 6  | 1                            | 5  | 16731.3808 (0.002) | -0.0011 |
| B2          | 0  | 8   | 2   | 7           | B1 | 0  | 7  | 1                            | 6  | 18690.7127 (0.002) | 0.0002  |
| A1          | 0  | 9   | 2   | 8           | A2 | 0  | 8  | 1                            | 7  | 20655.3449 (0.002) | 0.0024  |
| B2          | 0  | 10  | 2   | 9           | B1 | 0  | 9  | 1                            | 8  | 22621.2534 (0.002) | -0.0031 |
| A1          | 0  | 10  | 1   | 10          | A2 | 0  | 9  | 1                            | 9  | 20652.3100 (0.002) | 0.0008  |
| A2          | 0  | 11  | 1   | 11          | A1 | 0  | 10 | 1                            | 10 | 22619.1275 (0.002) | 0.0002  |
| B1          | 0  | 5   | 1   | 4           | B2 | 0  | 4  | 2                            | 3  | 12666.6844 (0.002) | -0.0006 |
| A2          | 0  | 6   | 1   | 5           | A1 | 0  | 5  | 2                            | 4  | 14730.7300 (0.002) | 0.0008  |
| B1          | 0  | 7   | 1   | 6           | B2 | 0  | 6  | 2                            | 5  | 16718.5778 (0.002) | -0.0002 |
| A2          | 0  | 8   | 1   | 7           | A1 | 0  | 7  | 2                            | 6  | 18688.3962 (0.002) | 0.0009  |
| B1          | 0  | 9   | 1   | 8           | B2 | 0  | 8  | 2                            | 7  | 20654.9498 (0.002) | -0.0005 |
| A2          | 0  | 10  | 1   | 9           | A1 | 0  | 9  | 2                            | 8  | 22621.1940 (0.002) | 0.0007  |
| B1          | 0  | 4   | 3   | 2           | B2 | 0  | 3  | 2                            | 1  | 14316.9244 (0.002) | -0.0006 |
| A2          | 0  | 5   | 3   | 3           | A1 | 0  | 4  | 2                            | 2  | 15879.0585 (0.002) | 0.0038  |
| A2          | 0  | 7   | 3   | 5           | A1 | 0  | 6  | 2                            | 4  | 18884.0148 (0.002) | 0.0007  |
| B1          | 0  | 8   | 3   | 6           | B2 | 0  | 7  | 2                            | 5  | 20716.6311 (0.002) | -0.0008 |
| B1          | 0  | 3   | 3   | 0           | B2 | 0  | 2  | 2                            | 1  | 12961.4930 (0.002) | -0.0042 |
| A1          | 0  | 6   | 2   | 4           | A2 | 0  | 5  | 3                            | 3  | 16268.5440 (0.002) | 0.0015  |
| B2          | 0  | 7   | 2   | 5           | B1 | 0  | 6  | 3                            | 4  | 18578.6965 (0.002) | 0.0005  |
| A1          | 0  | 8   | 2   | 6           | A2 | 0  | 7  | 3                            | 5  | 20642.2954 (0.002) | -0.0013 |
| B2          | 0  | 9   | 2   | 7           | B1 | 0  | 8  | 3                            | 6  | 22628.6021 (0.002) | 0.0036  |
| E2          | 1  | 6   | 1   | 6           | E2 | 1  | 5  | 0                            | 5  | 13180.1624 (0.002) | 0.0058  |
| E2          | 1  | 8   | 1   | 8           | E2 | 1  | 7  | 0                            | 7  | 16791.8338 (0.002) | 0.0003  |
| E1          | 1  | 9   | 1   | 9           | E1 | 1  | 8  | 0                            | 8  | 18732.2495 (0.002) | 0.0008  |
| E2          | 1  | 10  | 1   | 10          | E2 | 1  | 9  | 0                            | 9  | 20686.8141 (0.002) | 0.0018  |
| E2          | 1  | 3   | 1   | 2           | E2 | 1  | 2  | 1                            | 2  | 9365.7105 (0.002)  | 0.0025  |
| E2          | 1  | 5   | 0   | 5           | E2 | 1  | 4  | 1                            | 4  | 10195.2446 (0.002) | -0.0029 |
| E1          | 1  | 6   | 0   | 6           | E1 | 1  | 5  | 1                            | 5  | 12679.4353 (0.002) | -0.0019 |
| E2          | 1  | 7   | 0   | 7           | E2 | 1  | 6  | 1                            | 6  | 14784.4713 (0.002) | -0.0010 |

|    |   |    |   |    |    |   |   |   |   |                    |         |
|----|---|----|---|----|----|---|---|---|---|--------------------|---------|
| E1 | 1 | 8  | 0 | 8  | E1 | 1 | 7 | 1 | 7 | 16768.7438 (0.002) | 0.0005  |
| E2 | 1 | 9  | 0 | 9  | E2 | 1 | 8 | 1 | 8 | 18728.2076 (0.002) | -0.0007 |
| E1 | 1 | 10 | 0 | 10 | E1 | 1 | 9 | 1 | 9 | 20686.1544 (0.002) | -0.0005 |
| E2 | 1 | 4  | 2 | 3  | E2 | 1 | 3 | 1 | 2 | 12631.4652 (0.002) | 0.0005  |
| E1 | 1 | 5  | 2 | 4  | E1 | 1 | 4 | 1 | 3 | 15276.1589 (0.002) | -0.0024 |
| E1 | 1 | 9  | 2 | 8  | E1 | 1 | 8 | 1 | 7 | 21042.9387 (0.002) | -0.0033 |
| E2 | 1 | 3  | 2 | 1  | E2 | 1 | 2 | 2 | 1 | 10193.0762 (0.002) | 0.0029  |
| E1 | 1 | 4  | 2 | 2  | E1 | 1 | 3 | 2 | 2 | 13116.8323 (0.002) | -0.0006 |
| E2 | 1 | 5  | 2 | 3  | E2 | 1 | 4 | 2 | 3 | 16048.4324 (0.002) | -0.0014 |
| E1 | 1 | 6  | 2 | 4  | E1 | 1 | 5 | 2 | 4 | 19161.2358 (0.002) | 0.0025  |
| E2 | 1 | 7  | 1 | 6  | E2 | 1 | 6 | 2 | 5 | 15644.2909 (0.002) | 0.0015  |
| E1 | 1 | 8  | 1 | 7  | E1 | 1 | 7 | 2 | 6 | 18530.1675 (0.002) | -0.0001 |
| E2 | 1 | 9  | 1 | 8  | E2 | 1 | 8 | 2 | 7 | 20762.3243 (0.002) | -0.0006 |
| E2 | 1 | 4  | 3 | 2  | E2 | 1 | 3 | 2 | 1 | 13553.5092 (0.002) | -0.0021 |
| E1 | 1 | 4  | 3 | 1  | E1 | 1 | 3 | 3 | 1 | 14035.1509 (0.002) | -0.0002 |



**Table S11.** Rotational transitions of the  $^{13}\text{C}$  (7) isotopologue of 2,6-difluorotoluene.

| Upper level |    |     |     | Lower level |    |    |    | Measured (Unc. ) o.-c. (MHz) |    |                    |         |
|-------------|----|-----|-----|-------------|----|----|----|------------------------------|----|--------------------|---------|
| Sym'm'      | J' | Ka' | Kc' | Sym m       | J  | Ka | Kc |                              |    |                    |         |
| B1          | 0  | 4   | 1   | 4           | B2 | 0  | 3  | 0                            | 3  | 8864.8711 (0.002)  | 0.0015  |
| A2          | 0  | 5   | 1   | 5           | A1 | 0  | 4  | 0                            | 4  | 10812.6858 (0.002) | 0.0002  |
| B1          | 0  | 6   | 1   | 6           | B2 | 0  | 5  | 0                            | 5  | 12774.3670 (0.002) | 0.0001  |
| B1          | 0  | 8   | 1   | 8           | B2 | 0  | 7  | 0                            | 7  | 16703.6238 (0.002) | -0.0003 |
| A2          | 0  | 9   | 1   | 9           | A1 | 0  | 8  | 0                            | 8  | 18668.6170 (0.002) | 0.0013  |
| B1          | 0  | 10  | 0   | 10          | B2 | 0  | 9  | 0                            | 9  | 20633.6422 (0.002) | 0.0007  |
| B2          | 0  | 11  | 0   | 11          | B1 | 0  | 10 | 0                            | 10 | 22598.6834 (0.002) | 0.0012  |
| B2          | 0  | 3   | 0   | 3           | B1 | 0  | 2  | 1                            | 2  | 6787.9855 (0.002)  | 0.0008  |
| A1          | 0  | 6   | 0   | 6           | A2 | 0  | 5  | 1                            | 5  | 12773.2400 (0.002) | -0.0009 |
| B2          | 0  | 7   | 0   | 7           | B1 | 0  | 6  | 1                            | 6  | 14738.5710 (0.002) | -0.0011 |
| A1          | 0  | 8   | 0   | 8           | A2 | 0  | 7  | 1                            | 7  | 16703.5993 (0.002) | 0.0001  |
| B2          | 0  | 9   | 0   | 9           | B1 | 0  | 8  | 1                            | 8  | 18668.6111 (0.002) | -0.0011 |
| A1          | 0  | 5   | 2   | 4           | A2 | 0  | 4  | 1                            | 3  | 12926.6478 (0.002) | -0.0016 |
| B2          | 0  | 6   | 2   | 5           | B1 | 0  | 5  | 1                            | 4  | 14780.2427 (0.002) | 0.0003  |
| A1          | 0  | 7   | 2   | 6           | A2 | 0  | 6  | 1                            | 5  | 16715.8623 (0.002) | -0.0009 |
| B2          | 0  | 8   | 2   | 7           | B1 | 0  | 7  | 1                            | 6  | 18673.6816 (0.002) | 0.0001  |
| A1          | 0  | 9   | 2   | 8           | A2 | 0  | 8  | 1                            | 7  | 20636.6068 (0.002) | -0.0004 |
| A1          | 0  | 10  | 1   | 10          | A2 | 0  | 9  | 1                            | 9  | 20633.6422 (0.002) | 0.0012  |
| A2          | 0  | 11  | 1   | 11          | A1 | 0  | 10 | 1                            | 10 | 22598.6834 (0.002) | 0.0011  |
| B1          | 0  | 3   | 3   | 0           | B2 | 0  | 2  | 2                            | 1  | 12942.3609 (0.002) | -0.0021 |
| B1          | 0  | 4   | 3   | 2           | B2 | 0  | 3  | 2                            | 1  | 14289.4578 (0.010) | -0.0052 |
| A2          | 0  | 5   | 3   | 3           | A1 | 0  | 4  | 2                            | 2  | 15849.4187 (0.002) | 0.0040  |
| B1          | 0  | 6   | 3   | 4           | B2 | 0  | 5  | 2                            | 3  | 17251.6115 (0.010) | -0.0026 |
| A2          | 0  | 7   | 3   | 5           | A1 | 0  | 6  | 2                            | 4  | 18861.0975 (0.002) | -0.0008 |
| B1          | 0  | 8   | 3   | 6           | B2 | 0  | 7  | 2                            | 5  | 20695.8175 (0.002) | -0.0014 |
| A2          | 0  | 4   | 1   | 3           | A1 | 0  | 3  | 2                            | 2  | 10359.4458 (0.002) | 0.0010  |
| B1          | 0  | 5   | 1   | 4           | B2 | 0  | 4  | 2                            | 3  | 12658.5041 (0.002) | 0.0002  |
| A2          | 0  | 6   | 1   | 5           | A1 | 0  | 5  | 2                            | 4  | 14718.3035 (0.002) | 0.0007  |
| B1          | 0  | 7   | 1   | 6           | B2 | 0  | 6  | 2                            | 5  | 16703.6115 (0.002) | -0.0055 |
| A2          | 0  | 8   | 1   | 7           | A1 | 0  | 7  | 2                            | 6  | 18671.4835 (0.002) | -0.0008 |
| B1          | 0  | 9   | 1   | 8           | B2 | 0  | 8  | 2                            | 7  | 20636.2404 (0.002) | 0.0018  |
| A1          | 0  | 6   | 2   | 4           | A2 | 0  | 5  | 3                            | 3  | 16265.9046 (0.002) | 0.0015  |
| B2          | 0  | 7   | 2   | 5           | B1 | 0  | 6  | 3                            | 4  | 18566.1329 (0.002) | 0.0015  |
| A1          | 0  | 8   | 2   | 6           | A2 | 0  | 7  | 3                            | 5  | 20624.6596 (0.002) | 0.0000  |
| E2          | 1  | 6   | 1   | 6           | E2 | 1  | 5  | 0                            | 5  | 13163.2474 (0.002) | 0.0027  |
| E2          | 1  | 8   | 1   | 8           | E2 | 1  | 7  | 0                            | 7  | 16775.9843 (0.002) | -0.0007 |
| E1          | 1  | 9   | 1   | 9           | E1 | 1  | 8  | 0                            | 8  | 18715.0439 (0.002) | 0.0001  |
| E1          | 1  | 6   | 0   | 6           | E1 | 1  | 5  | 1                            | 5  | 12671.8644 (0.002) | -0.0025 |
| E2          | 1  | 7   | 0   | 7           | E2 | 1  | 6  | 1                            | 6  | 14772.1260 (0.002) | -0.0009 |
| E1          | 1  | 8   | 0   | 8           | E1 | 1  | 7  | 1                            | 7  | 16753.6781 (0.002) | 0.0018  |
| E2          | 1  | 9   | 0   | 9           | E2 | 1  | 8  | 1                            | 8  | 18711.1702 (0.002) | -0.0006 |
| E1          | 1  | 5   | 2   | 4           | E1 | 1  | 4  | 1                            | 3  | 15257.2248 (0.002) | -0.0019 |
| E1          | 1  | 7   | 2   | 6           | E1 | 1  | 6  | 1                            | 5  | 18536.9928 (0.002) | -0.0002 |
| E2          | 1  | 8   | 2   | 7           | E2 | 1  | 7  | 1                            | 6  | 19573.9891 (0.002) | 0.0014  |

|    |   |   |   |   |    |   |   |   |   |                    |         |
|----|---|---|---|---|----|---|---|---|---|--------------------|---------|
| E2 | 1 | 5 | 1 | 4 | E2 | 1 | 4 | 1 | 4 | 16107.4937 (0.002) | 0.0009  |
| E2 | 1 | 5 | 2 | 3 | E2 | 1 | 4 | 2 | 3 | 16030.3808 (0.002) | -0.0030 |
| E1 | 1 | 6 | 2 | 4 | E1 | 1 | 5 | 2 | 4 | 19146.0954 (0.002) | 0.0032  |
| E2 | 1 | 7 | 1 | 6 | E2 | 1 | 6 | 2 | 5 | 15653.4238 (0.002) | 0.0005  |
| E1 | 1 | 8 | 1 | 7 | E1 | 1 | 7 | 2 | 6 | 18523.4712 (0.002) | -0.0015 |

**Table S12.** Rotational transitions of the  $^{13}\text{C}$  (1) isotopologue of 3,5-difluorotoluene.

| Upper level |    |     |     | Lower level |    |    |    | Measured (Unc. ) o.-c. (MHz) |    |                    |         |
|-------------|----|-----|-----|-------------|----|----|----|------------------------------|----|--------------------|---------|
| Sym'm'      | J' | Ka' | Kc' | Sym m       | J  | Ka | Kc |                              |    |                    |         |
| A2          | 0  | 3   | 0   | 3           | A1 | 0  | 2  | 0                            | 2  | 6152.2218 (0.002)  | 0.0018  |
| B2          | 0  | 5   | 0   | 5           | B1 | 0  | 4  | 0                            | 4  | 9667.5582 (0.002)  | -0.0016 |
| B1          | 0  | 6   | 0   | 6           | B2 | 0  | 5  | 0                            | 5  | 11425.2657 (0.002) | -0.0004 |
| B2          | 0  | 7   | 0   | 7           | B1 | 0  | 6  | 0                            | 6  | 13182.9704 (0.002) | -0.0009 |
| B1          | 0  | 8   | 0   | 8           | B2 | 0  | 7  | 0                            | 7  | 14940.6743 (0.002) | -0.0007 |
| B2          | 0  | 9   | 0   | 9           | B1 | 0  | 8  | 0                            | 8  | 16698.3762 (0.002) | -0.0007 |
| B1          | 0  | 10  | 0   | 10          | B2 | 0  | 9  | 0                            | 9  | 18456.0750 (0.002) | -0.0019 |
| B2          | 0  | 11  | 0   | 11          | B1 | 0  | 10 | 0                            | 10 | 20213.7740 (0.002) | -0.0006 |
| B1          | 0  | 12  | 0   | 12          | B2 | 0  | 11 | 0                            | 11 | 21971.4691 (0.002) | -0.0009 |
|             |    |     |     |             |    |    |    |                              |    |                    |         |
| A1          | 0  | 4   | 1   | 4           | A2 | 0  | 3  | 0                            | 3  | 7909.8542 (0.002)  | 0.0007  |
|             |    |     |     |             |    |    |    |                              |    |                    |         |
| A2          | 0  | 5   | 1   | 5           | A1 | 0  | 4  | 1                            | 4  | 9667.5582 (0.002)  | -0.0016 |
| A1          | 0  | 6   | 1   | 6           | A2 | 0  | 5  | 1                            | 5  | 11425.2657 (0.002) | -0.0004 |
| A2          | 0  | 7   | 1   | 7           | A1 | 0  | 6  | 1                            | 6  | 13182.9704 (0.002) | -0.0009 |
| A1          | 0  | 8   | 1   | 8           | A2 | 0  | 7  | 1                            | 7  | 14940.6743 (0.002) | -0.0007 |
| A2          | 0  | 9   | 1   | 9           | A1 | 0  | 8  | 1                            | 8  | 16698.3762 (0.002) | -0.0007 |
| A1          | 0  | 10  | 1   | 10          | A2 | 0  | 9  | 1                            | 9  | 18456.0750 (0.002) | -0.0019 |
| A2          | 0  | 11  | 1   | 11          | A1 | 0  | 10 | 1                            | 10 | 20213.7740 (0.002) | -0.0006 |
| A1          | 0  | 12  | 1   | 12          | A2 | 0  | 11 | 1                            | 11 | 21971.4691 (0.002) | -0.0009 |
|             |    |     |     |             |    |    |    |                              |    |                    |         |
| B1          | 0  | 4   | 0   | 4           | B2 | 0  | 3  | 1                            | 3  | 7909.8542 (0.002)  | 0.0017  |
|             |    |     |     |             |    |    |    |                              |    |                    |         |
| B2          | 0  | 6   | 1   | 5           | B1 | 0  | 5  | 1                            | 4  | 13183.2880 (0.002) | 0.0001  |
| B1          | 0  | 7   | 1   | 6           | B2 | 0  | 6  | 1                            | 5  | 14940.9871 (0.002) | 0.0002  |
| B2          | 0  | 8   | 1   | 7           | B1 | 0  | 7  | 1                            | 6  | 16698.6873 (0.002) | 0.0014  |
| B1          | 0  | 9   | 1   | 8           | B2 | 0  | 8  | 1                            | 7  | 18456.3853 (0.002) | 0.0016  |
| B2          | 0  | 10  | 1   | 9           | B1 | 0  | 9  | 1                            | 8  | 20214.0790 (0.002) | -0.0007 |
| B1          | 0  | 11  | 1   | 10          | B2 | 0  | 10 | 1                            | 9  | 21971.7748 (0.002) | 0.0013  |
|             |    |     |     |             |    |    |    |                              |    |                    |         |
| A1          | 0  | 6   | 3   | 4           | A2 | 0  | 5  | 2                            | 3  | 14941.3739 (0.002) | 0.0008  |
|             |    |     |     |             |    |    |    |                              |    |                    |         |
| B2          | 0  | 7   | 2   | 5           | B1 | 0  | 6  | 2                            | 4  | 16699.0217 (0.002) | 0.0001  |
| B1          | 0  | 8   | 2   | 6           | B2 | 0  | 7  | 2                            | 5  | 18456.7048 (0.002) | 0.0009  |
|             |    |     |     |             |    |    |    |                              |    |                    |         |
| A2          | 0  | 6   | 2   | 5           | A1 | 0  | 5  | 2                            | 4  | 13183.2880 (0.002) | 0.0001  |
| A1          | 0  | 7   | 2   | 6           | A2 | 0  | 6  | 2                            | 5  | 14940.9871 (0.002) | 0.0002  |
| A2          | 0  | 8   | 2   | 7           | A1 | 0  | 7  | 2                            | 6  | 16698.6873 (0.002) | 0.0014  |
| A1          | 0  | 9   | 2   | 8           | A2 | 0  | 8  | 2                            | 7  | 18456.3853 (0.002) | 0.0016  |
| A2          | 0  | 10  | 2   | 9           | A1 | 0  | 9  | 2                            | 8  | 20214.0790 (0.002) | -0.0007 |
| A1          | 0  | 11  | 2   | 10          | A2 | 0  | 10 | 2                            | 9  | 21971.7748 (0.002) | 0.0013  |
|             |    |     |     |             |    |    |    |                              |    |                    |         |
| A2          | 0  | 7   | 3   | 5           | A1 | 0  | 6  | 3                            | 4  | 16699.0217 (0.002) | -0.0001 |
| A1          | 0  | 8   | 3   | 6           | A2 | 0  | 7  | 3                            | 5  | 18456.7048 (0.002) | 0.0009  |
|             |    |     |     |             |    |    |    |                              |    |                    |         |
| B2          | 0  | 6   | 3   | 3           | B1 | 0  | 5  | 3                            | 2  | 16702.3679 (0.002) | -0.0009 |
| B1          | 0  | 7   | 3   | 4           | B2 | 0  | 6  | 3                            | 3  | 18457.2307 (0.002) | 0.0071  |
|             |    |     |     |             |    |    |    |                              |    |                    |         |
| B1          | 0  | 6   | 2   | 4           | B2 | 0  | 5  | 3                            | 3  | 14941.3446 (0.002) | -0.0007 |
|             |    |     |     |             |    |    |    |                              |    |                    |         |
| A1          | 0  | 7   | 4   | 4           | A2 | 0  | 6  | 4                            | 3  | 18457.1361 (0.002) | -0.0044 |
|             |    |     |     |             |    |    |    |                              |    |                    |         |
| E2          | 1  | 8   | 0   | 8           | E2 | 1  | 7  | 0                            | 7  | 14978.5998 (0.002) | 0.0013  |
| E2          | 1  | 9   | 0   | 9           | E2 | 1  | 8  | 0                            | 8  | 16726.7689 (0.002) | 0.0016  |
| E2          | 1  | 10  | 0   | 10          | E2 | 1  | 9  | 0                            | 9  | 18478.1874 (0.002) | 0.0012  |

|    |   |    |   |    |    |   |   |   |   |                    |         |
|----|---|----|---|----|----|---|---|---|---|--------------------|---------|
| E2 | 1 | 6  | 1 | 6  | E2 | 1 | 5 | 0 | 5 | 11519.2833 (0.002) | 0.0004  |
| E1 | 1 | 7  | 1 | 7  | E1 | 1 | 6 | 0 | 6 | 13237.0093 (0.002) | -0.0002 |
| E1 | 1 | 8  | 1 | 8  | E1 | 1 | 7 | 1 | 7 | 14978.5747 (0.002) | 0.0017  |
| E1 | 1 | 9  | 1 | 9  | E1 | 1 | 8 | 1 | 8 | 16726.7689 (0.002) | 0.0011  |
| E1 | 1 | 10 | 1 | 10 | E1 | 1 | 9 | 1 | 9 | 18478.1874 (0.002) | 0.0012  |
| E2 | 1 | 8  | 2 | 7  | E2 | 1 | 7 | 1 | 6 | 16886.0915 (0.002) | -0.0012 |
| E1 | 1 | 6  | 0 | 6  | E1 | 1 | 5 | 1 | 5 | 11497.3759 (0.002) | -0.0003 |
| E2 | 1 | 7  | 0 | 7  | E2 | 1 | 6 | 1 | 6 | 13236.0594 (0.002) | 0.0005  |
| E1 | 1 | 6  | 1 | 5  | E1 | 1 | 5 | 2 | 4 | 13007.5134 (0.002) | 0.0000  |
| E2 | 1 | 7  | 1 | 6  | E2 | 1 | 6 | 2 | 5 | 15151.0855 (0.002) | -0.0027 |
| E1 | 1 | 8  | 1 | 7  | E1 | 1 | 7 | 2 | 6 | 16875.6367 (0.002) | -0.0015 |
| E2 | 1 | 6  | 3 | 4  | E2 | 1 | 5 | 2 | 3 | 16886.6626 (0.002) | -0.0018 |

**Table S13.** Rotational transitions of the  $^{13}\text{C}$  (2) and  $^{13}\text{C}$  (6) isotopologue of 3,5-difluorotoluene.

| Upper level |    |     |     | Lower level |    |    |    | Measured (Unc. ) o.-c. (MHz) |    |                    |         |
|-------------|----|-----|-----|-------------|----|----|----|------------------------------|----|--------------------|---------|
| Sym'm'      | J' | Ka' | Kc' | Sym m       | J  | Ka | Kc |                              |    |                    |         |
| A2          | 0  | 8   | 1   | 7           | A1 | 0  | 8  | 0                            | 8  | 13187.1966 (0.002) | 0.0000  |
| A2          | 0  | 3   | 0   | 3           | A1 | 0  | 2  | 0                            | 2  | 6153.2213 (0.002)  | 0.0025  |
| A2          | 0  | 5   | 0   | 5           | A1 | 0  | 4  | 0                            | 4  | 9669.1423 (0.002)  | -0.0001 |
| A1          | 0  | 6   | 0   | 6           | A2 | 0  | 5  | 0                            | 5  | 11427.1360 (0.002) | -0.0008 |
| A2          | 0  | 7   | 0   | 7           | A1 | 0  | 6  | 0                            | 6  | 13185.1294 (0.002) | -0.0007 |
| A1          | 0  | 8   | 0   | 8           | A2 | 0  | 7  | 0                            | 7  | 14943.1210 (0.002) | -0.0008 |
| A2          | 0  | 9   | 0   | 9           | A1 | 0  | 8  | 0                            | 8  | 16701.1114 (0.002) | -0.0004 |
| A1          | 0  | 10  | 0   | 10          | A2 | 0  | 9  | 0                            | 9  | 18459.0996 (0.002) | -0.0002 |
| A2          | 0  | 11  | 0   | 11          | A1 | 0  | 10 | 0                            | 10 | 20217.0855 (0.002) | -0.0001 |
| A1          | 0  | 12  | 0   | 12          | A2 | 0  | 11 | 0                            | 11 | 21975.0689 (0.002) | -0.0001 |
| A2          | 0  | 3   | 1   | 3           | A1 | 0  | 2  | 0                            | 2  | 6153.2213 (0.002)  | 0.0016  |
| A2          | 0  | 6   | 1   | 5           | A1 | 0  | 5  | 1                            | 4  | 13185.4415 (0.002) | -0.0009 |
| A1          | 0  | 7   | 1   | 6           | A2 | 0  | 6  | 1                            | 5  | 14943.4301 (0.002) | 0.0003  |
| A2          | 0  | 8   | 1   | 7           | A1 | 0  | 7  | 1                            | 6  | 16701.4169 (0.002) | -0.0001 |
| A1          | 0  | 9   | 1   | 8           | A2 | 0  | 8  | 1                            | 7  | 18459.4020 (0.002) | -0.0009 |
| A1          | 0  | 5   | 2   | 4           | A2 | 0  | 4  | 1                            | 3  | 11427.4644 (0.002) | 0.0031  |
| A2          | 0  | 3   | 1   | 3           | A1 | 0  | 2  | 1                            | 2  | 6153.0885 (0.002)  | -0.0009 |
| A2          | 0  | 5   | 1   | 5           | A1 | 0  | 4  | 1                            | 4  | 9669.1423 (0.002)  | -0.0001 |
| A1          | 0  | 6   | 1   | 6           | A2 | 0  | 5  | 1                            | 5  | 11427.1360 (0.002) | -0.0008 |
| A2          | 0  | 7   | 1   | 7           | A1 | 0  | 6  | 1                            | 6  | 13185.1294 (0.002) | -0.0007 |
| A1          | 0  | 8   | 1   | 8           | A2 | 0  | 7  | 1                            | 7  | 14943.1210 (0.002) | -0.0008 |
| A2          | 0  | 9   | 1   | 9           | A1 | 0  | 8  | 1                            | 8  | 16701.1114 (0.002) | -0.0004 |
| A1          | 0  | 10  | 1   | 10          | A2 | 0  | 9  | 1                            | 9  | 18459.0996 (0.002) | -0.0002 |
| A2          | 0  | 11  | 1   | 11          | A1 | 0  | 10 | 1                            | 10 | 20217.0855 (0.002) | -0.0001 |
| A1          | 0  | 12  | 1   | 12          | A2 | 0  | 11 | 1                            | 11 | 21975.0689 (0.002) | -0.0001 |
| A2          | 0  | 3   | 0   | 3           | A1 | 0  | 2  | 1                            | 2  | 6153.0885 (0.002)  | -0.0001 |
| A2          | 0  | 8   | 2   | 7           | A1 | 0  | 8  | 1                            | 8  | 13187.1966 (0.002) | 0.0000  |
| A2          | 0  | 5   | 3   | 3           | A1 | 0  | 4  | 2                            | 2  | 13186.9203 (0.002) | -0.0007 |
| A2          | 0  | 6   | 2   | 5           | A1 | 0  | 5  | 2                            | 4  | 13185.4415 (0.002) | -0.0009 |
| A1          | 0  | 7   | 2   | 6           | A2 | 0  | 6  | 2                            | 5  | 14943.4301 (0.002) | 0.0003  |
| A2          | 0  | 8   | 2   | 7           | A1 | 0  | 7  | 2                            | 6  | 16701.4169 (0.002) | -0.0001 |
| A1          | 0  | 9   | 2   | 8           | A2 | 0  | 8  | 2                            | 7  | 18459.4020 (0.002) | -0.0009 |
| A1          | 0  | 5   | 1   | 4           | A2 | 0  | 4  | 2                            | 3  | 11427.4545 (0.002) | -0.0008 |
| A1          | 0  | 6   | 2   | 4           | A2 | 0  | 5  | 2                            | 3  | 14943.8045 (0.002) | 0.0008  |
| A2          | 0  | 7   | 2   | 5           | A1 | 0  | 6  | 2                            | 4  | 16701.7461 (0.002) | 0.0000  |
| A1          | 0  | 8   | 2   | 6           | A2 | 0  | 7  | 2                            | 5  | 18459.7177 (0.002) | 0.0002  |
| A2          | 0  | 6   | 4   | 3           | A1 | 0  | 5  | 3                            | 2  | 16704.8618 (0.002) | 0.0002  |
| A1          | 0  | 7   | 4   | 4           | A2 | 0  | 6  | 3                            | 3  | 18460.2113 (0.002) | 0.0003  |
| A2          | 0  | 5   | 3   | 3           | A1 | 0  | 4  | 3                            | 2  | 13184.9686 (0.002) | 0.0002  |
| A1          | 0  | 6   | 3   | 4           | A2 | 0  | 5  | 3                            | 3  | 14943.7805 (0.002) | 0.0006  |
| A2          | 0  | 7   | 3   | 5           | A1 | 0  | 6  | 3                            | 4  | 16701.7461 (0.002) | 0.0003  |

|    |   |    |   |    |    |   |    |   |    |                    |         |
|----|---|----|---|----|----|---|----|---|----|--------------------|---------|
| A1 | 0 | 8  | 3 | 6  | A2 | 0 | 7  | 3 | 5  | 18459.7177 (0.002) | 0.0002  |
| A2 | 0 | 5  | 2 | 3  | A1 | 0 | 4  | 3 | 2  | 13184.9446 (0.002) | 0.0002  |
| A1 | 0 | 7  | 3 | 4  | A2 | 0 | 6  | 4 | 3  | 18460.1390 (0.002) | 0.0010  |
| E  | 1 | 10 | 0 | 10 | E  | 1 | 9  | 0 | 9  | 18481.5238 (0.002) | 0.0022  |
| E  | 1 | 11 | 0 | 11 | E  | 1 | 10 | 0 | 10 | 20235.0570 (0.002) | 0.0022  |
| E  | 1 | 6  | 1 | 6  | E  | 1 | 5  | 0 | 5  | 11525.6794 (0.002) | 0.0005  |
| E  | 1 | 7  | 1 | 7  | E  | 1 | 6  | 0 | 6  | 13240.3303 (0.002) | 0.0004  |
| E  | 1 | 8  | 1 | 8  | E  | 1 | 7  | 0 | 7  | 14981.6522 (0.002) | 0.0006  |
| E  | 1 | 9  | 1 | 9  | E  | 1 | 8  | 0 | 8  | 16729.9222 (0.002) | 0.0005  |
| E  | 1 | 4  | 2 | 3  | E  | 1 | 3  | 1 | 2  | 10862.4063 (0.002) | 0.0004  |
| E  | 1 | 8  | 2 | 7  | E  | 1 | 7  | 1 | 6  | 16896.0825 (0.002) | -0.0027 |
| E  | 1 | 5  | 0 | 5  | E  | 1 | 4  | 1 | 4  | 9671.2324 (0.002)  | -0.0026 |
| E  | 1 | 6  | 0 | 6  | E  | 1 | 5  | 1 | 5  | 11498.1621 (0.002) | -0.0011 |
| E  | 1 | 7  | 0 | 7  | E  | 1 | 6  | 1 | 6  | 13238.9102 (0.002) | -0.0007 |
| E  | 1 | 8  | 0 | 8  | E  | 1 | 7  | 1 | 7  | 14981.6033 (0.002) | 0.0004  |
| E  | 1 | 9  | 0 | 9  | E  | 1 | 8  | 1 | 8  | 16729.9222 (0.002) | 0.0017  |
| E  | 1 | 10 | 1 | 10 | E  | 1 | 9  | 1 | 9  | 18481.5238 (0.002) | 0.0022  |
| E  | 1 | 11 | 1 | 11 | E  | 1 | 10 | 1 | 10 | 20235.0570 (0.002) | 0.0022  |
| E  | 1 | 6  | 3 | 4  | E  | 1 | 5  | 2 | 3  | 16905.7556 (0.002) | -0.0007 |
| E  | 1 | 4  | 2 | 2  | E  | 1 | 3  | 2 | 2  | 11110.5527 (0.002) | -0.0004 |
| E  | 1 | 8  | 1 | 7  | E  | 1 | 7  | 2 | 6  | 16880.5285 (0.002) | -0.0024 |

**Table S14.** Rotational transitions of the  $^{13}\text{C}$  (3) and  $^{13}\text{C}$  (5) isotopologues of 3,5-difluorotoluene.

| Upper level |    |     |     | Lower level |    |    |    | Measured(Unc. ) o.-c. (MHz) |    |                    |         |
|-------------|----|-----|-----|-------------|----|----|----|-----------------------------|----|--------------------|---------|
| Sym'm'      | J' | Ka' | Kc' | Sym m       | J  | Ka | Kc |                             |    |                    |         |
| A1          | 0  | 4   | 0   | 4           | A2 | 0  | 3  | 0                           | 3  | 7914.4425 (0.002)  | -0.0006 |
| A1          | 0  | 6   | 0   | 6           | A2 | 0  | 5  | 0                           | 5  | 11431.8950 (0.002) | -0.0009 |
| A2          | 0  | 7   | 0   | 7           | A1 | 0  | 6  | 0                           | 6  | 13190.6206 (0.002) | -0.0002 |
| A1          | 0  | 8   | 0   | 8           | A2 | 0  | 7  | 0                           | 7  | 14949.3442 (0.002) | 0.0000  |
| A2          | 0  | 9   | 0   | 9           | A1 | 0  | 8  | 0                           | 8  | 16708.0665 (0.002) | 0.0007  |
| A1          | 0  | 10  | 0   | 10          | A2 | 0  | 9  | 0                           | 9  | 18466.7859 (0.002) | 0.0004  |
| A2          | 0  | 11  | 0   | 11          | A1 | 0  | 10 | 0                           | 10 | 20225.5039 (0.002) | 0.0009  |
| A1          | 0  | 12  | 0   | 12          | A2 | 0  | 11 | 0                           | 11 | 21984.2180 (0.002) | -0.0001 |
|             |    |     |     |             |    |    |    |                             |    |                    |         |
| A2          | 0  | 3   | 1   | 3           | A1 | 0  | 2  | 0                           | 2  | 6155.7679 (0.010)  | 0.0014  |
|             |    |     |     |             |    |    |    |                             |    |                    |         |
| A2          | 0  | 8   | 1   | 7           | A1 | 0  | 8  | 0                           | 8  | 13192.7490 (0.002) | -0.0006 |
| A1          | 0  | 9   | 1   | 8           | A2 | 0  | 9  | 0                           | 9  | 14951.7794 (0.002) | 0.0007  |
|             |    |     |     |             |    |    |    |                             |    |                    |         |
| A1          | 0  | 4   | 1   | 4           | A2 | 0  | 3  | 1                           | 3  | 7914.4425 (0.002)  | 0.0000  |
| A1          | 0  | 6   | 1   | 6           | A2 | 0  | 5  | 1                           | 5  | 11431.8950 (0.002) | -0.0009 |
| A2          | 0  | 7   | 1   | 7           | A1 | 0  | 6  | 1                           | 6  | 13190.6206 (0.002) | -0.0002 |
| A1          | 0  | 8   | 1   | 8           | A2 | 0  | 7  | 1                           | 7  | 14949.3442 (0.002) | 0.0000  |
| A2          | 0  | 9   | 1   | 9           | A1 | 0  | 8  | 1                           | 8  | 16708.0665 (0.002) | 0.0007  |
| A1          | 0  | 10  | 1   | 10          | A2 | 0  | 9  | 1                           | 9  | 18466.7859 (0.002) | 0.0004  |
| A2          | 0  | 11  | 1   | 11          | A1 | 0  | 10 | 1                           | 10 | 20225.5039 (0.002) | 0.0009  |
| A1          | 0  | 12  | 1   | 12          | A2 | 0  | 11 | 1                           | 11 | 21984.2180 (0.002) | -0.0001 |
|             |    |     |     |             |    |    |    |                             |    |                    |         |
| A2          | 0  | 6   | 1   | 5           | A1 | 0  | 5  | 1                           | 4  | 13190.9384 (0.002) | 0.0003  |
| A1          | 0  | 7   | 1   | 6           | A2 | 0  | 6  | 1                           | 5  | 14949.6576 (0.002) | -0.0003 |
| A2          | 0  | 8   | 1   | 7           | A1 | 0  | 7  | 1                           | 6  | 16708.3774 (0.002) | 0.0002  |
| A1          | 0  | 9   | 1   | 8           | A2 | 0  | 8  | 1                           | 7  | 18467.0947 (0.002) | -0.0002 |
|             |    |     |     |             |    |    |    |                             |    |                    |         |
| A1          | 0  | 5   | 2   | 4           | A2 | 0  | 4  | 1                           | 3  | 11432.2202 (0.002) | -0.0021 |
|             |    |     |     |             |    |    |    |                             |    |                    |         |
| A2          | 0  | 8   | 2   | 7           | A1 | 0  | 8  | 1                           | 8  | 13192.7490 (0.002) | -0.0006 |
| A1          | 0  | 9   | 2   | 8           | A2 | 0  | 9  | 1                           | 9  | 14951.7794 (0.002) | 0.0007  |
|             |    |     |     |             |    |    |    |                             |    |                    |         |
| A1          | 0  | 10  | 3   | 8           | A2 | 0  | 10 | 1                           | 9  | 14951.6555 (0.002) | -0.0007 |
|             |    |     |     |             |    |    |    |                             |    |                    |         |
| A2          | 0  | 3   | 0   | 3           | A1 | 0  | 2  | 1                           | 2  | 6155.6668 (0.010)  | -0.0007 |
|             |    |     |     |             |    |    |    |                             |    |                    |         |
| A2          | 0  | 9   | 2   | 7           | A1 | 0  | 9  | 1                           | 8  | 13192.6355 (0.002) | -0.0014 |
|             |    |     |     |             |    |    |    |                             |    |                    |         |
| A1          | 0  | 5   | 1   | 4           | A2 | 0  | 4  | 2                           | 3  | 11432.2202 (0.002) | 0.0018  |
|             |    |     |     |             |    |    |    |                             |    |                    |         |
| A2          | 0  | 6   | 2   | 5           | A1 | 0  | 5  | 2                           | 4  | 13190.9384 (0.002) | 0.0003  |
| A1          | 0  | 7   | 2   | 6           | A2 | 0  | 6  | 2                           | 5  | 14949.6576 (0.002) | -0.0003 |
| A2          | 0  | 8   | 2   | 7           | A1 | 0  | 7  | 2                           | 6  | 16708.3774 (0.002) | 0.0002  |
| A1          | 0  | 9   | 2   | 8           | A2 | 0  | 8  | 2                           | 7  | 18467.0947 (0.002) | -0.0002 |
|             |    |     |     |             |    |    |    |                             |    |                    |         |
| A1          | 0  | 6   | 2   | 4           | A2 | 0  | 5  | 2                           | 3  | 14950.0192 (0.002) | -0.0009 |
| A2          | 0  | 7   | 2   | 5           | A1 | 0  | 6  | 2                           | 4  | 16708.7059 (0.002) | -0.0001 |
|             |    |     |     |             |    |    |    |                             |    |                    |         |
| A2          | 0  | 5   | 3   | 3           | A1 | 0  | 4  | 2                           | 2  | 13192.1363 (0.002) | -0.0004 |
| A1          | 0  | 6   | 3   | 4           | A2 | 0  | 5  | 2                           | 3  | 14950.0192 (0.002) | -0.0011 |

|    |   |    |   |    |    |   |    |   |   |                    |         |
|----|---|----|---|----|----|---|----|---|---|--------------------|---------|
| A2 | 0 | 10 | 3 | 7  | A1 | 0 | 10 | 2 | 8 | 13192.4975 (0.002) | 0.0013  |
| A1 | 0 | 11 | 3 | 8  | A2 | 0 | 11 | 2 | 9 | 14951.5101 (0.002) | 0.0014  |
| A1 | 0 | 10 | 2 | 8  | A2 | 0 | 10 | 2 | 9 | 14951.6555 (0.002) | -0.0007 |
| A2 | 0 | 9  | 3 | 7  | A1 | 0 | 9  | 2 | 8 | 13192.6355 (0.002) | -0.0014 |
| A2 | 0 | 10 | 4 | 7  | A1 | 0 | 10 | 3 | 8 | 13192.4975 (0.002) | 0.0013  |
| A1 | 0 | 11 | 4 | 8  | A2 | 0 | 11 | 3 | 9 | 14951.5101 (0.002) | 0.0014  |
| A2 | 0 | 11 | 4 | 7  | A1 | 0 | 11 | 3 | 8 | 13192.3233 (0.002) | 0.0007  |
| A1 | 0 | 6  | 3 | 4  | A2 | 0 | 5  | 3 | 3 | 14950.0047 (0.002) | 0.0003  |
| A2 | 0 | 7  | 3 | 5  | A1 | 0 | 6  | 3 | 4 | 16708.7059 (0.002) | 0.0000  |
| A1 | 0 | 6  | 2 | 4  | A2 | 0 | 5  | 3 | 3 | 14950.0047 (0.002) | 0.0004  |
| A2 | 0 | 6  | 4 | 3  | A1 | 0 | 5  | 4 | 2 | 16707.6946 (0.002) | -0.0009 |
| A2 | 0 | 6  | 3 | 3  | A1 | 0 | 5  | 4 | 2 | 16707.6481 (0.002) | 0.0001  |
| A2 | 0 | 11 | 5 | 7  | A1 | 0 | 11 | 4 | 8 | 13192.3233 (0.002) | 0.0007  |
| E  | 1 | 6  | 1 | 6  | E  | 1 | 5  | 0 | 5 | 11530.5876 (0.002) | 0.0018  |
| E  | 1 | 7  | 1 | 7  | E  | 1 | 6  | 0 | 6 | 13245.8748 (0.002) | 0.0006  |
| E  | 1 | 8  | 1 | 8  | E  | 1 | 7  | 0 | 7 | 14987.9075 (0.002) | 0.0000  |
| E  | 1 | 9  | 1 | 9  | E  | 1 | 8  | 0 | 8 | 16736.9005 (0.002) | 0.0000  |
| E  | 1 | 10 | 0 | 10 | E  | 1 | 9  | 0 | 9 | 18489.2285 (0.002) | 0.0017  |
| E  | 1 | 6  | 0 | 6  | E  | 1 | 5  | 1 | 5 | 11502.9366 (0.002) | -0.0003 |
| E  | 1 | 6  | 0 | 6  | E  | 1 | 5  | 1 | 5 | 11502.9352 (0.002) | -0.0017 |
| E  | 1 | 7  | 0 | 7  | E  | 1 | 6  | 1 | 6 | 13244.4449 (0.002) | -0.0001 |
| E  | 1 | 8  | 0 | 8  | E  | 1 | 7  | 1 | 7 | 14987.8587 (0.002) | 0.0003  |
| E  | 1 | 9  | 0 | 9  | E  | 1 | 8  | 1 | 8 | 16736.9005 (0.002) | 0.0012  |
| E  | 1 | 7  | 2 | 6  | E  | 1 | 6  | 1 | 5 | 15371.8603 (0.002) | 0.0014  |
| E  | 1 | 8  | 2 | 7  | E  | 1 | 7  | 1 | 6 | 16903.2970 (0.002) | -0.0008 |
| E  | 1 | 10 | 1 | 10 | E  | 1 | 9  | 1 | 9 | 18489.2285 (0.002) | 0.0018  |
| E  | 1 | 5  | 2 | 3  | E  | 1 | 4  | 2 | 3 | 14112.4503 (0.002) | 0.0016  |
| E  | 1 | 8  | 1 | 7  | E  | 1 | 7  | 2 | 6 | 16887.6304 (0.002) | -0.0028 |
| E  | 1 | 6  | 3 | 4  | E  | 1 | 5  | 2 | 3 | 16913.0595 (0.002) | -0.0021 |
| E  | 1 | 6  | 3 | 3  | E  | 1 | 5  | 3 | 3 | 17217.2153 (0.002) | -0.0006 |



**Table S15.** Rotational transitions of the  $^{13}\text{C}$  (4) isotopologue of 3,5-difluorotoluene.

| Upper level |    |     |     | Lower level |    |    |    | Measured (Unc. ) o.-c. (MHz) |   |                    |         |
|-------------|----|-----|-----|-------------|----|----|----|------------------------------|---|--------------------|---------|
| Sym'm'      | J' | Ka' | Kc' | Sym m       | J  | Ka | Kc |                              |   |                    |         |
| A2          | 0  | 3   | 0   | 3           | A1 | 0  | 2  | 0                            | 2 | 6154.7863 (0.002)  | 0.0000  |
| B2          | 0  | 5   | 0   | 5           | B1 | 0  | 4  | 0                            | 4 | 9671.6170 (0.002)  | 0.0003  |
| B1          | 0  | 6   | 0   | 6           | B2 | 0  | 5  | 0                            | 5 | 11430.0609 (0.002) | -0.0001 |
| B2          | 0  | 7   | 0   | 7           | B1 | 0  | 6  | 0                            | 6 | 13188.5037 (0.002) | -0.0004 |
| B1          | 0  | 8   | 0   | 8           | B2 | 0  | 7  | 0                            | 7 | 14946.9457 (0.002) | 0.0001  |
| B2          | 0  | 9   | 0   | 9           | B1 | 0  | 8  | 0                            | 8 | 16705.3854 (0.002) | -0.0001 |
| B1          | 0  | 10  | 0   | 10          | B2 | 0  | 9  | 0                            | 9 | 18463.8242 (0.002) | 0.0009  |
|             |    |     |     |             |    |    |    |                              |   |                    |         |
| A1          | 0  | 4   | 1   | 4           | A2 | 0  | 3  | 0                            | 3 | 7913.1716 (0.002)  | -0.0005 |
|             |    |     |     |             |    |    |    |                              |   |                    |         |
| B2          | 0  | 3   | 1   | 3           | B1 | 0  | 2  | 1                            | 2 | 6154.6709 (0.002)  | 0.0007  |
| A2          | 0  | 5   | 1   | 5           | A1 | 0  | 4  | 1                            | 4 | 9671.6170 (0.002)  | 0.0003  |
| A1          | 0  | 6   | 1   | 6           | A2 | 0  | 5  | 1                            | 5 | 11430.0609 (0.002) | -0.0001 |
| A2          | 0  | 7   | 1   | 7           | A1 | 0  | 6  | 1                            | 6 | 13188.5037 (0.002) | -0.0004 |
| A1          | 0  | 8   | 1   | 8           | A2 | 0  | 7  | 1                            | 7 | 14946.9457 (0.002) | 0.0001  |
| A2          | 0  | 9   | 1   | 9           | A1 | 0  | 8  | 1                            | 8 | 16705.3854 (0.002) | -0.0001 |
| A1          | 0  | 10  | 1   | 10          | A2 | 0  | 9  | 1                            | 9 | 18463.8242 (0.002) | 0.0009  |
|             |    |     |     |             |    |    |    |                              |   |                    |         |
| B1          | 0  | 5   | 1   | 4           | B2 | 0  | 4  | 1                            | 3 | 11430.3852 (0.002) | 0.0012  |
| B2          | 0  | 6   | 1   | 5           | B1 | 0  | 5  | 1                            | 4 | 13188.8160 (0.002) | -0.0003 |
| B1          | 0  | 7   | 1   | 6           | B2 | 0  | 6  | 1                            | 5 | 14947.2538 (0.002) | 0.0000  |
| B2          | 0  | 8   | 1   | 7           | B1 | 0  | 7  | 1                            | 6 | 16705.6905 (0.002) | -0.0006 |
| B1          | 0  | 9   | 1   | 8           | B2 | 0  | 8  | 1                            | 7 | 18464.1279 (0.002) | 0.0009  |
|             |    |     |     |             |    |    |    |                              |   |                    |         |
| B1          | 0  | 4   | 0   | 4           | B2 | 0  | 3  | 1                            | 3 | 7913.1716 (0.002)  | 0.0002  |
|             |    |     |     |             |    |    |    |                              |   |                    |         |
| A2          | 0  | 5   | 2   | 3           | A1 | 0  | 4  | 2                            | 2 | 13190.1502 (0.002) | -0.0034 |
| B2          | 0  | 7   | 2   | 5           | B1 | 0  | 6  | 2                            | 4 | 16706.0183 (0.002) | 0.0005  |
| B1          | 0  | 8   | 2   | 6           | B2 | 0  | 7  | 2                            | 5 | 18464.4408 (0.002) | 0.0001  |
|             |    |     |     |             |    |    |    |                              |   |                    |         |
| A2          | 0  | 4   | 2   | 3           | A1 | 0  | 3  | 2                            | 2 | 9671.6797 (0.002)  | 0.0019  |
| A1          | 0  | 5   | 2   | 4           | A2 | 0  | 4  | 2                            | 3 | 11430.3781 (0.002) | -0.0008 |
| A2          | 0  | 6   | 2   | 5           | A1 | 0  | 5  | 2                            | 4 | 13188.8160 (0.002) | -0.0002 |
| A1          | 0  | 7   | 2   | 6           | A2 | 0  | 6  | 2                            | 5 | 14947.2538 (0.002) | 0.0000  |
| A2          | 0  | 8   | 2   | 7           | A1 | 0  | 7  | 2                            | 6 | 16705.6905 (0.002) | -0.0006 |
| A1          | 0  | 9   | 2   | 8           | A2 | 0  | 8  | 2                            | 7 | 18464.1279 (0.002) | 0.0009  |
|             |    |     |     |             |    |    |    |                              |   |                    |         |
| A1          | 0  | 6   | 3   | 4           | A2 | 0  | 5  | 2                            | 3 | 14947.6200 (0.002) | -0.0006 |
|             |    |     |     |             |    |    |    |                              |   |                    |         |
| A2          | 0  | 7   | 3   | 5           | A1 | 0  | 6  | 3                            | 4 | 16706.0183 (0.002) | 0.0004  |
| A1          | 0  | 8   | 3   | 6           | A2 | 0  | 7  | 3                            | 5 | 18464.4408 (0.002) | 0.0001  |
|             |    |     |     |             |    |    |    |                              |   |                    |         |
| B1          | 0  | 6   | 2   | 4           | B2 | 0  | 5  | 3                            | 3 | 14947.5997 (0.002) | -0.0007 |
|             |    |     |     |             |    |    |    |                              |   |                    |         |
| B1          | 0  | 7   | 3   | 4           | B2 | 0  | 6  | 3                            | 3 | 18464.9123 (0.002) | -0.0003 |
|             |    |     |     |             |    |    |    |                              |   |                    |         |
| A2          | 0  | 6   | 4   | 3           | A1 | 0  | 5  | 4                            | 2 | 16704.7622 (0.002) | 0.0015  |
| A1          | 0  | 7   | 4   | 4           | A2 | 0  | 6  | 4                            | 3 | 18464.8516 (0.002) | -0.0007 |
|             |    |     |     |             |    |    |    |                              |   |                    |         |
| E2          | 1  | 6   | 1   | 6           | E2 | 1  | 5  | 0                            | 5 | 11524.4453 (0.002) | 0.0018  |
| E1          | 1  | 7   | 1   | 7           | E1 | 1  | 6  | 0                            | 6 | 13242.6559 (0.002) | 0.0015  |
|             |    |     |     |             |    |    |    |                              |   |                    |         |
| E2          | 1  | 8   | 0   | 8           | E2 | 1  | 7  | 0                            | 7 | 14984.9347 (0.002) | -0.0005 |
| E2          | 1  | 9   | 0   | 9           | E2 | 1  | 8  | 0                            | 8 | 16733.8241 (0.002) | 0.0002  |
| E2          | 1  | 10  | 0   | 10          | E2 | 1  | 9  | 0                            | 9 | 18485.9705 (0.002) | 0.0003  |

|    |   |    |   |    |    |   |   |   |   |                    |         |
|----|---|----|---|----|----|---|---|---|---|--------------------|---------|
| E1 | 1 | 8  | 1 | 8  | E1 | 1 | 7 | 1 | 7 | 14984.9068 (0.002) | -0.0016 |
| E1 | 1 | 9  | 1 | 9  | E1 | 1 | 8 | 1 | 8 | 16733.8241 (0.002) | -0.0003 |
| E1 | 1 | 10 | 1 | 10 | E1 | 1 | 9 | 1 | 9 | 18485.9705 (0.002) | 0.0003  |
| E2 | 1 | 4  | 2 | 3  | E2 | 1 | 3 | 1 | 2 | 10848.1099 (0.002) | 0.0041  |
| E2 | 1 | 8  | 2 | 7  | E2 | 1 | 7 | 1 | 6 | 16893.6937 (0.002) | -0.0003 |
| E1 | 1 | 6  | 0 | 6  | E1 | 1 | 5 | 1 | 5 | 11502.1428 (0.002) | -0.0013 |
| E2 | 1 | 7  | 0 | 7  | E2 | 1 | 6 | 1 | 6 | 13241.6734 (0.002) | -0.0004 |
| E1 | 1 | 8  | 1 | 7  | E1 | 1 | 7 | 2 | 6 | 16882.9112 (0.002) | -0.0016 |
| E1 | 1 | 4  | 2 | 2  | E1 | 1 | 3 | 2 | 2 | 11086.8810 (0.002) | 0.0052  |
| E2 | 1 | 5  | 2 | 3  | E2 | 1 | 4 | 2 | 3 | 14112.6284 (0.002) | -0.0008 |
| E2 | 1 | 4  | 3 | 2  | E2 | 1 | 3 | 2 | 1 | 11204.2460 (0.002) | 0.0017  |
| E2 | 1 | 6  | 3 | 4  | E2 | 1 | 5 | 2 | 3 | 16894.8808 (0.002) | 0.0019  |
| E2 | 1 | 5  | 3 | 2  | E2 | 1 | 4 | 3 | 2 | 14183.4562 (0.002) | 0.0007  |
| E1 | 1 | 5  | 4 | 2  | E1 | 1 | 4 | 3 | 1 | 14267.1507 (0.002) | -0.0043 |
| E2 | 1 | 6  | 4 | 3  | E2 | 1 | 5 | 3 | 2 | 17229.7887 (0.002) | -0.0026 |

**Table S16.** Rotational transitions of the  $^{13}\text{C}$  (7) isotopologue of 3,5-difluorotoluene.

| Upper level |    |     |     | Lower level |    |    |    | Measured (Unc. ) o.-c. (MHz) |    |                    |         |
|-------------|----|-----|-----|-------------|----|----|----|------------------------------|----|--------------------|---------|
| Sym'm'      | J' | Ka' | Kc' | Sym m       | J  | Ka | Kc |                              |    |                    |         |
| A1          | 0  | 4   | 0   | 4           | A2 | 0  | 3  | 0                            | 3  | 7819.5593 (0.002)  | 0.0012  |
| B1          | 0  | 6   | 0   | 6           | B2 | 0  | 5  | 0                            | 5  | 11294.7554 (0.002) | -0.0008 |
| B2          | 0  | 7   | 0   | 7           | B1 | 0  | 6  | 0                            | 6  | 13032.3756 (0.002) | -0.0023 |
| B1          | 0  | 8   | 0   | 8           | B2 | 0  | 7  | 0                            | 7  | 14769.9988 (0.002) | -0.0007 |
| B1          | 0  | 10  | 0   | 10          | B2 | 0  | 9  | 0                            | 9  | 18245.2385 (0.002) | -0.0004 |
| B2          | 0  | 11  | 0   | 11          | B1 | 0  | 10 | 0                            | 10 | 19982.8561 (0.002) | 0.0003  |
| B1          | 0  | 12  | 0   | 12          | B2 | 0  | 11 | 0                            | 11 | 21720.4709 (0.002) | 0.0005  |
|             |    |     |     |             |    |    |    |                              |    |                    |         |
| B1          | 0  | 4   | 1   | 4           | B2 | 0  | 3  | 1                            | 3  | 7819.4935 (0.002)  | 0.0008  |
| A1          | 0  | 6   | 1   | 6           | A2 | 0  | 5  | 1                            | 5  | 11294.7554 (0.002) | -0.0008 |
| A2          | 0  | 7   | 1   | 7           | A1 | 0  | 6  | 1                            | 6  | 13032.3756 (0.002) | -0.0023 |
| A1          | 0  | 8   | 1   | 8           | A2 | 0  | 7  | 1                            | 7  | 14769.9988 (0.002) | -0.0007 |
| A1          | 0  | 10  | 1   | 10          | A2 | 0  | 9  | 1                            | 9  | 18245.2385 (0.002) | -0.0004 |
| A2          | 0  | 11  | 1   | 11          | A1 | 0  | 10 | 1                            | 10 | 19982.8561 (0.002) | 0.0003  |
| A1          | 0  | 12  | 1   | 12          | A2 | 0  | 11 | 1                            | 11 | 21720.4709 (0.002) | 0.0005  |
|             |    |     |     |             |    |    |    |                              |    |                    |         |
| B1          | 0  | 5   | 1   | 4           | B2 | 0  | 4  | 1                            | 3  | 11295.5862 (0.002) | 0.0002  |
| B2          | 0  | 6   | 1   | 5           | B1 | 0  | 5  | 1                            | 4  | 13032.8384 (0.002) | -0.0026 |
| B1          | 0  | 7   | 1   | 6           | B2 | 0  | 6  | 1                            | 5  | 14770.3970 (0.002) | -0.0002 |
|             |    |     |     |             |    |    |    |                              |    |                    |         |
| A1          | 0  | 5   | 2   | 4           | A2 | 0  | 4  | 2                            | 3  | 11295.1334 (0.002) | 0.0010  |
| A2          | 0  | 6   | 2   | 5           | A1 | 0  | 5  | 2                            | 4  | 13032.8294 (0.002) | 0.0022  |
| A1          | 0  | 7   | 2   | 6           | A2 | 0  | 6  | 2                            | 5  | 14770.3970 (0.002) | 0.0001  |
|             |    |     |     |             |    |    |    |                              |    |                    |         |
| A1          | 0  | 4   | 2   | 2           | A2 | 0  | 3  | 2                            | 1  | 11419.6888 (0.002) | -0.0010 |
| A1          | 0  | 6   | 2   | 4           | A2 | 0  | 5  | 2                            | 3  | 14772.7029 (0.002) | 0.0008  |
|             |    |     |     |             |    |    |    |                              |    |                    |         |
| B1          | 0  | 6   | 3   | 4           | B2 | 0  | 5  | 3                            | 3  | 14770.9076 (0.002) | 0.0014  |
|             |    |     |     |             |    |    |    |                              |    |                    |         |
| E2          | 1  | 8   | 0   | 8           | E2 | 1  | 7  | 0                            | 7  | 14806.2779 (0.002) | -0.0012 |
| E2          | 1  | 9   | 0   | 9           | E2 | 1  | 8  | 0                            | 8  | 16534.8410 (0.002) | 0.0001  |
| E2          | 1  | 10  | 0   | 10          | E2 | 1  | 9  | 0                            | 9  | 18266.4664 (0.002) | 0.0012  |
|             |    |     |     |             |    |    |    |                              |    |                    |         |
| E2          | 1  | 6   | 1   | 6           | E2 | 1  | 5  | 0                            | 5  | 11379.6033 (0.002) | 0.0008  |
| E1          | 1  | 7   | 1   | 7           | E1 | 1  | 6  | 0                            | 6  | 13083.6264 (0.002) | -0.0001 |
|             |    |     |     |             |    |    |    |                              |    |                    |         |
| E1          | 1  | 8   | 1   | 8           | E1 | 1  | 7  | 1                            | 7  | 14806.2779 (0.002) | 0.0024  |
| E1          | 1  | 9   | 1   | 9           | E1 | 1  | 8  | 1                            | 8  | 16534.8410 (0.002) | 0.0001  |
| E1          | 1  | 10  | 1   | 10          | E1 | 1  | 9  | 1                            | 9  | 18266.4664 (0.002) | 0.0012  |
|             |    |     |     |             |    |    |    |                              |    |                    |         |
| E1          | 1  | 7   | 2   | 6           | E1 | 1  | 6  | 1                            | 5  | 15098.9608 (0.002) | -0.0011 |
| E2          | 1  | 8   | 2   | 7           | E2 | 1  | 7  | 1                            | 6  | 16680.6163 (0.002) | -0.0003 |
|             |    |     |     |             |    |    |    |                              |    |                    |         |
| E1          | 1  | 6   | 0   | 6           | E1 | 1  | 5  | 1                            | 5  | 11367.2708 (0.002) | 0.0006  |
| E2          | 1  | 7   | 0   | 7           | E2 | 1  | 6  | 1                            | 6  | 13083.3024 (0.002) | -0.0011 |
|             |    |     |     |             |    |    |    |                              |    |                    |         |
| E1          | 1  | 6   | 1   | 5           | E1 | 1  | 5  | 2                            | 4  | 12995.5886 (0.002) | 0.0000  |
|             |    |     |     |             |    |    |    |                              |    |                    |         |
| E1          | 1  | 6   | 3   | 3           | E1 | 1  | 5  | 3                            | 3  | 16959.0156 (0.002) | -0.0006 |

**Table S17.** Stark effect measurements on several rotational transitions of 2,6-difluorotoluene.

For each electric field (V cm<sup>-1</sup>) the Table presents the observed (Obs.), calculated (Calc.) and observed minus calculated (Obs.-Calc.) frequencies (MHz).

| $J' - J''$               | Electric field | Obs.        | Calc.      | Obs.-Calc. |
|--------------------------|----------------|-------------|------------|------------|
| $2_{0,2} - 1_{1,1}$      | 0.0            | 4556.32700  | 4556.3261  | 0.0009     |
| $M_{F'} - M_{F''}=2 - 1$ | 33.6504        | 4556.30987  | 4556.3118  | -0.0019    |
|                          | 37.0090        | 4556.30744  | 4556.3088  | -0.0014    |
|                          | 42.0469        | 4556.30297  | 4556.3038  | -0.0008    |
|                          | 50.4433        | 4556.29244  | 4556.2940  | -0.0016    |
| $2_{2,1} - 1_{1,0}$      | 0.0            | 7803.16250  | 7803.1616  | 0.00090    |
| $M_{F'} - M_{F''}=2 - 1$ | 16.8575        | 7803.15403  | 7803.1522  | 0.00185    |
|                          | 33.6504        | 7803.12560  | 7803.1241  | 0.00151    |
|                          | 42.0469        | 7803.10199  | 7803.1030  | -0.00105   |
|                          | 50.4433        | 7803.07728  | 7803.0773  | -0.00004   |
|                          | 58.8396        | 7803.04852  | 7803.0469  | 0.00159    |
|                          | 67.2361        | 7803.01066  | 7803.0119  | -0.00122   |
| $3_{0,3} - 2_{1,2}$      | 0.0            | 6833.59115  | 6833.5914  | -0.0003    |
| $M_{F'} - M_{F''}=3 - 2$ | 16.8575        | 6833.59133  | 6833.5917  | -0.0004    |
|                          | 33.6504        | 6833.59258  | 6833.5927  | -0.0001    |
|                          | 50.4433        | 6833.59376  | 6833.5943  | -0.0005    |
|                          | 67.2361        | 6833.59574  | 6833.5965  | -0.0007    |
|                          | 75.6325        | 6833.59707  | 6833.5978  | -0.0007    |
|                          | 84.0290        | 6833.59855  | 6833.5993  | -0.0007    |
|                          | 92.4253        | 6833.60022  | 6833.6010  | -0.0007    |
|                          | 100.8219       | 6833.60211  | 6833.6028  | -0.0007    |
|                          | 109.2182       | 6833.60401  | 6833.6048  | -0.0007    |
|                          | 117.6147       | 6833.60632  | 6833.6069  | -0.0006    |
|                          | 126.0111       | 6833.60820  | 6833.6092  | -0.0010    |
| 134.4076                 | 6833.61098     | 6833.6116   | -0.0007    |            |
| $3_{3,0} - 2_{2,1}$      | 0.0000         | 13151.15224 | 13151.1513 | 0.00094    |
| $M_{F'} - M_{F''}=3 - 2$ | 16.8575        | 13151.15292 | 13151.1534 | -0.00049   |
|                          | 50.4433        | 13151.17130 | 13151.1702 | 0.00105    |
|                          | 67.2361        | 13151.18333 | 13151.1850 | -0.00164   |
|                          | 84.0290        | 13151.20291 | 13151.2039 | -0.00098   |
|                          | 92.4253        | 13151.21580 | 13151.2149 | 0.00088    |
| $4_{0,4} - 3_{1,3}$      | 0.0            | 8904.61834  | 8904.6175  | 0.0008     |
| $M_{F'} - M_{F''}=4 - 3$ | 50.4433        | 8904.62216  | 8904.6228  | -0.0006    |
|                          | 84.0290        | 8904.63111  | 8904.6321  | -0.0009    |
|                          | 92.4353        | 8904.63531  | 8904.6351  | 0.0002     |
|                          | 100.8219       | 8904.63882  | 8904.6384  | 0.0004     |
|                          | 109.2182       | 8904.64245  | 8904.6421  | 0.0004     |
|                          | 117.6147       | 8904.64600  | 8904.6460  | 0.0001     |
|                          | 126.0111       | 8904.65015  | 8904.6502  | -0.0000    |
| $4_{0,4} - 3_{1,3}$      | 0.0            | 8904.61834  | 8904.6175  | 0.0008     |
| $M_{F'} - M_{F''}=3 - 2$ | 50.4433        | 8904.61720  | 8904.6176  | -0.00044   |
|                          | 84.0290        | 8904.61882  | 8904.6178  | -0.001     |
|                          | 92.4353        | 8904.61779  | 8904.6179  | -0.0001    |
|                          | 100.8219       | 8904.61699  | 8904.6180  | -0.001     |
|                          | 109.2182       | 8904.61681  | 8904.6181  | -0.001     |
|                          | 117.6147       | 8904.61845  | 8904.6181  | 0.0003     |
|                          | 126.0111       | 8904.61869  | 8904.6182  | 0.0004     |

**Table S18.** Stark effect measurements on several rotational transitions of 3,5-difluorotoluene.

For each electric field (V cm<sup>-1</sup>) the Table presents the observed (Obs.), calculated (Calc.) and observed minus calculated (Obs.-Calc.) frequencies (MHz).

| $J' - J''$               | Electric field      | Obs.       | Calc.      | Obs.-Calc. |
|--------------------------|---------------------|------------|------------|------------|
| $3_{0,3} - 2_{1,2}$      | 0.0                 | 6174.64400 | 6174.6419  | 0.0021     |
| $M_{F'} - M_{F''}=3 - 2$ | 16.8575             | 6174.65011 | 6174.6505  | -0.0003    |
|                          | 33.6504             | 6174.67665 | 6174.6761  | 0.0005     |
|                          | 42.0468             | 6174.69567 | 6174.6953  | 0.0004     |
|                          | 50.4433             | 6174.71940 | 6174.7188  | 0.0006     |
|                          | 58.8396             | 6174.74740 | 6174.7465  | 0.0009     |
|                          | 67.2361             | 6174.77970 | 6174.7784  | 0.0013     |
|                          | 75.6325             | 6174.81581 | 6174.8147  | 0.0011     |
|                          | 84.0290             | 6174.85491 | 6174.8552  | -0.0002    |
|                          | 92.4253             | 6174.90086 | 6174.8999  | 0.0009     |
|                          | 100.8219            | 6174.94958 | 6174.9489  | 0.0007     |
| $3_{0,3} - 2_{1,2}$      | 33.6504             | 6174.63820 | 6174.6380  | 0.0002     |
| $M_{F'} - M_{F''}=2 - 1$ | 42.0468             | 6174.63548 | 6174.6358  | -0.0003    |
|                          | 50.4433             | 6174.63351 | 6174.6331  | 0.0004     |
|                          | 58.8396             | 6174.63078 | 6174.6300  | 0.0008     |
|                          | 67.2361             | 6174.62793 | 6174.6263  | 0.0016     |
|                          | 75.6325             | 6174.62291 | 6174.6222  | 0.00074    |
|                          | 84.0290             | 6174.61847 | 6174.6176  | 0.00092    |
|                          | 100.8219            | 6174.60837 | 6174.6069  | 0.00015    |
|                          | $3_{0,3} - 2_{1,2}$ | 58.8396    | 6174.61513 | 6174.6132  |
| $M_{F'} - M_{F''}=1 - 0$ | 67.2361             | 6174.60510 | 6174.6044  | 0.00072    |
|                          | 75.6325             | 6174.59830 | 6174.5944  | 0.0039     |
|                          | 84.0290             | 6174.58567 | 6174.5833  | 0.00236    |
|                          | 100.8219            | 6174.55995 | 6174.5576  | 0.00238    |
| $4_{1,4} - 3_{0,3}$      | 0.0                 | 7938.78039 | 7938.7790  | 0.0014     |
| $M_{F'} - M_{F''}=4 - 3$ | 16.8575             | 7938.78096 | 7938.7827  | -0.0018    |
|                          | 33.6504             | 7938.79291 | 7938.7939  | -0.0010    |
|                          | 42.0468             | 7938.80211 | 7938.8022  | -0.00013   |
|                          | 50.4433             | 7938.81164 | 7938.8124  | -0.00081   |
|                          | 58.8396             | 7938.82512 | 7938.8245  | 0.00061    |
|                          | 67.2361             | 7938.83746 | 7938.8384  | -0.0010    |
|                          | 75.6325             | 7938.85237 | 7938.8542  | -0.0018    |
|                          | 84.0290             | 7938.87196 | 7938.8718  | 0.000120   |
|                          | $4_{1,4} - 3_{0,3}$ | 0.0000     | 7938.78039 | 7938.7790  |
| $M_{F'} - M_{F''}=3 - 2$ | 33.6504             | 7938.78274 | 7938.7806  | 0.0021     |
|                          | 42.0468             | 7938.78194 | 7938.7815  | 0.0004     |
|                          | 50.4433             | 7938.78257 | 7938.7826  | -0.0000    |
|                          | 58.8396             | 7938.78371 | 7938.7839  | -0.0002    |
|                          | 67.2361             | 7938.78643 | 7938.7854  | 0.0010     |
|                          | 75.6325             | 7938.78796 | 7938.7871  | 0.0009     |
|                          | 84.0290             | 7938.78941 | 7938.7890  | 0.00041    |
|                          | $4_{1,4} - 3_{0,3}$ | 50.4433    | 7938.77058 | 7938.7682  |
| $M_{F'} - M_{F''}=2 - 1$ | 58.8396             | 7938.76526 | 7938.7643  | 0.00093    |
